# Supplementary material for: Estimation of path attenuation and site characteristics in the north-west Himalaya and its adjoining area using generalized inversion method
Source: Copernicus journal article supplement (doi:10.5194/nhess-2018-148), 2018-07-10
Supplement: Supplementary file [file nhess-2018-148-AC3-supplement.pdf]

# **Estimation of path attenuation and site characteristics in the north-west Himalaya and its adjoining area within Indian Territory using generalized inversion method**

Harinarayan, NH<sup>1</sup>, Abhishek Kumar<sup>\*2</sup>

<sup>1,2</sup> Department of Civil Engineering, Indian Institute of Technology Guwahati, Assam, India.

Corresponding to: Kumar Abhishek (abhitoaashu@gmail.com/ abhiak@iitg.ernet.in)

1 **Abstract.** Present work focuses on the determination of path attenuation and site characteristics of earthquake  
2 recording stations, located in the north-west Himalaya and its adjoining region, within India. The work is done  
3 using two-step generalized inversion technique. In the first step of inversion, non-parametric attenuation curves  
4 are developed.  $Q_s = (105 \pm 11)f^{(0.94 \pm 0.08)}$  as S wave quality factor within 105km, is obtained indicating that  
5 the region is possibly heterogeneous as well as seismically active. In addition, presence of a kink is observed at  
6 around 105km hypocentral distance while correlating path attenuation with the hypocentral distance, indicating  
7 the presence of Moho discontinuity in the region. In the second step of inversion, site amplification curves are  
8 developed separately from the attenuation corrected data for horizontal and vertical components of the  
9 accelerograms. The amplification function and predominant frequency of each recording station based on  
10 generalized inversion method is estimated and compared with that obtained from horizontal to vertical spectral  
11 ratio (of S wave portion of the accelerograms) method. Path attenuation and site characteristics obtained in the  
12 present study are very essential for developing regional ground motion model and for the seismic hazard  
13 assessment of the above study area.

14 **Keywords:** *Seismicity, Northwest Himalaya, path attenuation, site characteristics, Generalized Inversion, HVSR*

15  
16  
17  
18  
19  
20  
21  
22  
23  
24  
25  
26  
27  
28  
29  
30  
31

## 32 **1 Introduction**

33 The Himalayan arc extending approximately 2500km between Kashmir and Arunachal Pradesh is one among  
34 the seismically most active regions across the globe. Seismic activity of this region can be understood based on  
35 induced damages witnessed primarily during 4 great earthquakes (EQs) including 1897 Shillong EQ, 1905  
36 Kangra EQ, 1950 Assam EQ and 1934 Bihar-Nepal EQ, occurred in the last 120 years. Based on seismic  
37 activity, the entire Himalayan belt can be subdivided into three distinct segments namely the western, the central  
38 and the eastern Himalayas (Philip, 2014). The region of the north-west Himalaya and its foothills, within India  
39 come under seismic zone IV and V as per IS 1893: 2016, indicating regions of high to very high seismicity.

40 Intensity of ground shaking during an EQ, at a particular site is a collective effect of source, path and  
41 site parameters. Source parameters include magnitude, fault mechanism, stress drop and rupture process. On the  
42 other hand, path parameters include geometric attenuation and loss of seismic energy due to the anelasticity of  
43 the earth and scattering of elastic waves in heterogeneous media. Similarly, site characteristics include  
44 modification of amplitude, frequency content and duration of the incoming seismic wave by subsurface medium  
45 as reaches the surface. Determinations of aforementioned EQ parameters are important for the development of  
46 region specific ground motion models, which can further be used for region/site specific seismic hazard  
47 assessment (Baro et al., 2018). Above parameters can be estimated from EQ records based on some spectral  
48 modelling or inversion approach like generalized inversion method (Andrews, 1986; Castro et al., 1990; Oth et  
49 al., 2009 etc.).

50 To understand the on-going seismicity of various regions within India, the Government of India has  
51 installed number of EQ recording stations. EQ records from these stations since 2004 are maintained by  
52 PESMOS (Program for Excellence in Strong Motion Studies), which is currently one of the most significant  
53 resource of ground motion records in India. At present, PESMOS manages EQ records from 300 recording  
54 stations which are distributed in the northern and northeaster parts of India as well as in the Andaman and  
55 Nicobar Islands (Kumar et al. 2012). It must be highlighted here that PESMOS database is lacking in terms of  
56 accurate information about subsurface for majority of recording stations (Harinarayan and Kumar, 2018). Site  
57 class given by PESMOS is based on physical description of surface materials, local geology following  
58 Seismotectonic Atlas of India (GIS 2000) and Geological Maps of Indian (GSI, 1998) and not based on actual  
59 field investigation (Kumar et al., 2012). In the absence of accurate information of local soil, utilizing EQ records  
60 from PESMOS database for seismic studies is a major challenge. Geophysical subsurface exploration studies on  
61 some of the recording stations in northwest Himalaya reported by Pandey et al., (2016a; b) had highlighted the  
62 flaws in site class given by PESMOS. There are recording stations classified to be on rock site but were found to  
63 be on soil sites by Pandey et al., (2016a; b). Harinarayan and Kumar (2018) also reported problems in the  
64 subsurface information given by PESMOS and attempted site classification of PESMOS recording stations

65 In the present study, EQ records from the region of the north-west Himalaya and its foothills within  
66 India, as obtained from PESMOS database, are analysed for estimating path attenuation and site characteristics  
67 separately, using a two-step generalized inversion of the S-wave Fourier spectra (hereafter referred to as GINV).  
68 In the first step, attenuation curves are developed using a non-parametric inversion approach (similar to Castro  
69 et al., 1990 and Oth et al., 2008). In the conventional generalized inversion method (Andrews, 1986; Hartzell,  
70 1992), the second step of inversion calculates both site and source spectra, by inverting the S-wave (or Coda

71 wave) spectra, corrected for the path parameter. This method however requires one or more reference sites  
72 (usually rock sites) in-order to remove the trade-off between the source and site parameters (Andrews 1986). In  
73 the absence of subsoil information for majority of recording stations managed by PESMOS as highlighted  
74 above, identifying reference site is not possible. For this reason, only the site parameters are evaluated in the  
75 second step of inversion, using a non-reference generalized inversion approach (similar to the work by Joshi et  
76 al., 2010; Harinarayan and Kumar 2017b). Further, Obtained site terms are compared with the one calculated  
77 from horizontal to vertical spectral ratios (HVSR) from the same S-wave window as used in the GINV.

78 This study is one of its kind, which systematically evaluates path and site parameters using a larger and  
79 regional database. Existing studies on attenuation characteristics determination for the northwest Himalaya used  
80 few EQ records that too from limited recording stations. Joshi (2006) estimated frequency independent S wave  
81 quality factor ( $Q_s$ ) for the Garhwal Himalayas using 1991 Uttarkashi EQ and 1999 Chamoli EQ ground motion  
82 records from 8 recording stations. In another study, Singh et al., (2012) estimated frequency depended  $Q_s$  for the  
83 Kumaun Himalayas using 23 EQ events, from 9 recording stations by applying the extended coda-normalization  
84 method. Similarly, Negi et al., (2015), Banerjee and Kumar, (2017) and Tripathi et al., (2015) estimated  $Q_s$  for  
85 the Garhwal Himalayas. The aforementioned studies did not highlight the attenuation characteristics of the  
86 entire north-west Himalaya region.

87 Similar to path attenuation studies, very few studies on the determination of site characteristics from  
88 EQ records also exist for this region. Nath et al., (2002) computed site terms using the aftershocks of the 1999  
89 Chamoli EQ, obtained from 5 recording stations located in the Uttarakhand region. Similarly, Sharma et al.,  
90 (2014) estimated site parameters for the Garhwal region of Uttarakhand using EQ records in context of  
91 generalized inversion and HVSR. In another work, Harinarayan and Kumar (2017) reported a comparative study  
92 on site characteristics computed using EQ records from Tarai region of Uttarakhand using multiple analytical  
93 approaches. In another recent work, Harinarayan and Kumar (2018) computed site parameters for recording  
94 stations in the northwest Himalayas in terms of predominant frequency ( $f_{peak}$ ) alone using HVSR method.

## 95 **2 Study Area**

96 Present study area includes states of Himachal Pradesh, Uttarakhand, Punjab, Haryana and national capital city,  
97 New Delhi, covering an area between 28° N to 34° N latitude and 75.8° E to 80.5° E longitude. According to  
98 2011 Census, the region has a population of 96 million. From seismicity point of view, major Seismotectonic  
99 features of the present study are characterized by three north-dipping thrust systems such as the Central thrust  
100 (MCT), the Main Boundary thrust (MBT) and the Himalayan frontal thrust (HFT) (Valdiya, 1981). Other  
101 tectonic features includes, the Jhelum Balakot fault, the Drang thrust, the Lesser Himalayan Crystalline Nappes,  
102 the Jammu thrust, the Vaikrita thrust, the Karakoram fault, the Jwala Mukhi thrust, and the Ramgarh thrust.  
103 Both the MCT and the MBT lie parallel to each other within western Himalayan region and were produced  
104 during the Cenozonic shortening (Malik and Nakata 2003). The HFT is the youngest active thrust separating the  
105 Himalaya region and the Indo-Gangetic alluvial plain (Kumar et al. 2009). The HFT, the MBT and the MCT  
106 have generated major EQs in this region (Philip et al. 2014).

107 Two of the most damage inducing EQs, in the last 120 years, in the west Himalayan regions include  
108 1905 Kangra-Himachal Pradesh EQ ( $M_s=7.8$ ) (Ambraseys and Douglas 2004) and 2005 Muzzafarbad-Kashmir  
109 EQ ( $M_w=7.6$ ) (Avouac et al. 2006). Both of these EQs caused severe loss to life and property. Recent EQs of  
110 1991 Uttarkashi ( $M_w=6.8$ ) and 1999 Chamoli ( $M_w=6.6$ ) had occurred on the MCT zone (Harbindu et al. 2014).  
111 The 1999 Chamoli EQ caused a huge landslide in Gopeshwar situated less than 2km northwest of Chamoli city  
112 (Sarkar et al. 2001). This EQ also caused shaking in Chandigarh and Delhi, located far away from the epicentre  
113 (Mundepi et al., 2010).

### 114 **3 Database**

115 Ground motion records used in this study consists of three components accelerograms obtained from PESMOS  
116 database available at <http://www.pesmos.in/>. The instrumentation used for recording EQs consists of internal  
117 AC-63 GeoSIG triaxial force balanced accelerometers and GSR-18 GeoSIG 18 bit digitizers with external GPS  
118 (Kumar et al., 2012). Further, ground motion recordings are done in trigger mode during each EQ with a  
119 sampling rate of 200 per second.

120 For the present analysis, ground motion records of EQs happened between 2004 and 2017, available on  
121 PESMOS are used. For estimating site characteristics, 341 records from 86 EQs, with magnitudes ranging from  
122  $M_w=2.3$  to 5.8, having focal depths ranging from 2 to 80km are used. Further, these records are corresponding  
123 to 101 recording stations, located in the hypocentral distance ranging from 9 to 355km. Coordinates of each of  
124 the recording station, used in this work are listed in Table 1, columns 2 and 3. Further, details of EQs used for  
125 estimating site characteristics are summarized in Table 2.

126 For estimating path attenuation however, only those EQs recorded at atleast two recording stations  
127 among which at least one recording station is located within hypocentral distance equal to or less than the  
128 reference distance (reference distance is discussed under section 'Spectral attenuation with distance) are  
129 considered. Out of 341 EQ records used for estimating site parameters, only 207 EQ records satisfies the above  
130 mentioned reference distance criteria. Final database for estimating path attenuation consists of 207 records  
131 from 32 EQs, recorded at 69 recording stations, with magnitude ( $M_w$ ) in the range of 3.1 to 5.5, focal depths  
132 from 3 to 55km and hypocentral distance from 9 to 200km. Table 3 summarizes the details of the dataset used  
133 for estimating path attenuation. In addition, Figure 1 shows the source-to-recording station distance of the data  
134 set used in the present study.

### 135 **3.1 Data processing**

136 Signal to pre-event noise (all of equal window length) ratio (SNR) for all the records are computed and records  
137 with  $SNR \geq 5$  (similar to Ameri et al., 2011) are considered for further analyses. All the EQ records are corrected  
138 for baseline correction following a 5% cosine taper and a band-pass filtering, between the frequency range of  
139 0.25Hz and 15Hz, using a Butterworth filter. Further, time windows starting about 0.5s before the onset of the S  
140 wave and ending when 90% of the total seismic energy of the EQ record is reached, are separated and tapered  
141 with a 5% cosine window (Ameri et al., 2011; Bindi et al., 2009). Typical lengths of the time windows for the  
142 present analysis vary from 4 to 15s. Further, for some of the records, where the window lengths obtained to be

143 longer than 15s, are fixed to 15s in order to minimize coda wave energy in the analysing time window (Oth et  
144 al., 2008). Later, based on the extracted windows, the Fourier amplitude spectra is calculated for each EQ  
145 record, smoothed by applying the Konno and Ohmachi (1999) algorithm, with the smoothing parameter “b” =  
146 20.

147 For further analyses, path and site parameters are estimated using above processed EQ records, based on two  
148 separate inversion procedures as discussed separately in the following sections.

#### 149 **4 Path attenuation**

150 In the first step of inversion, path attenuation curves are developed by eliminating the effect of site parameter,  
151 thereby retaining only the source and path attenuation characteristics. All EQ records, irrespective of whether  
152 located on soil or rock sites can be utilized for inversion. This way, present method is very much suitable for  
153 PSMOS database where accurate subsurface information of recording stations is not available. The horizontal  
154 portion of the accelerograms (obtained by the root mean square average of the east-west and north-south  
155 components) is considered for developing path attenuation curves. Detailed discussions on the method can be  
156 found in following sub-section.

#### 157 **4.1 Methodology**

158 Following Castro et al., (1990), observed spectral amplitude (acceleration)  $U_{ij}(f, R_{ij})$ , of EQ  $j$ , at recording  
159 station  $i$ , and frequency  $f$  can be modelled linearly as:

$$160 \ln U_{ij}(f, R_{ij}) = \ln M_i(f) + \ln A(f, R_{ij}) \quad (1)$$

161 Here,  $M_i(f)$  is a scalar, which is governed by the magnitude of the EQ (one value for each EQ).  $A(f, R_{ij})$  is the  
162 attenuation function and is independent of the magnitude of EQ. Here,  $A(f, R_{ij})$  incorporates both geometric  
163 spreading and anelastic attenuation variation with the hypocentral distance. It has to be mentioned here that  
164  $A(f, R_{ij})$  in Eq. (1) is not limited to a particular functional form, instead, is assumed to decay smoothly with  
165 hypocentral distance ( $R_{ij}$ ) and thus take the value of unity at a reference distance ( $R_0$ ), as given in Eq. 2 (Castro  
166 et al., 1990; 1996; 2003).

$$167 A(f, R_0) = 1 \quad (2)$$

168 Model given by Eq. (1) has no factor representing site effect and is contained in both  $A(f, R_{ij})$   
169 and  $M_i(f)$ . Any rapid undulations in  $A(f, R_{ij})$  are due to the absorbed site effects (Oth et al., 2008). Two  
170 weighing factors,  $w_1$  and  $w_2$  are incorporated in the Eq. (1) following Castro et al., (1990).  $w_2$  is used to  
171 smoothen the attenuation term with distance curve by suppressing the undulations and thereby removing any  
172 absorbed site effects from  $A(f, R_{ij})$ .  $w_2$  is used to impose  $A(f, R_0) = 1$  constraint, as mentioned earlier. The  
173 value of  $w_1$  and  $w_2$  here is chosen reasonably such that the site effects are suppressed but the change in the  
174 attenuation characteristics with distance can be observed (Oth et al., 2008). [Solution to Eq. \(1\) in the matrix  
175 form, after incorporating weighing factors, is obtained using singular value decomposition method, \(discussed in  
176 detail in Appendix A\).](#)

#### 177 **4.2 Spectral attenuation with distance**

178 Figure 2 shows the number of EQ records for various hypocentral distance range considered. It can be observed  
 179 from Figure 2 that there are very less EQ records available beyond hypocentral distance of 115km. For this  
 180 reason, EQ records with hypocentral distance up to 115km are only considered for the determination of path  
 181 attenuation. The constraint  $A(f, R_0) = 1$  is applied at  $R_0=15$ km, irrespective of the frequency. The hypocentral  
 182 distance range from 15 to 115km is divided into 10 bins, each bin having 10km width. Further, attenuation  
 183 curves are computed for each of the selected 17 frequencies from 1Hz to 15Hz (see Table 4, column 1).  
 184 Variation of attenuation curves with hypocentral distance, obtained in the present study, for the selected  
 185 frequencies is depicted in Figure 3. Based on Figure 3, a general trend in which attenuation curves exhibit decay  
 186 with hypocentral distance up to 105km can be observed. Beyond 105km a kink is observed as seen in Figure 3.  
 187 This kink in the attenuation curves beyond 105km is very distinct and clear at lower frequencies (<5.5 Hz).  
 188 Bindi et al., (2004) and Oth et al., (2011) reported a similar trend in the attenuation curves for the Umbria  
 189 Marche and Japan regions respectively. Oth et al., (2011) attributed this behaviour to the combined effect of  
 190 reflected or refracted wave arrivals from the Moho in Japan. Presence of Moho in the North-west Himalaya was  
 191 reported by Saikia et al., (2016) based on Teleseismic receiver function analysis. Referring to Oth et al., (2011)  
 192 work, presence of kink beyond 105km in attenuation curves, as obtained in this study may also be due reflected  
 193 or refracted waves from the Moho. Further, detailed study in this direction can be done in the future and is  
 194 beyond the presence scope of the work. Observing the attenuation curves at different frequencies as given in  
 195 Figure 3, it can concluded that attenuation curves at higher frequencies (>5.5Hz) decay more rapidly compared  
 196 to lower frequencies for the present study region. This observation is consistent with the findings by Castro et  
 197 al., (2003) for Guadeloupe (France) and Oth et al., (2011) for Japan.

198 Further, for the kink observed at 105km, in case of lower frequencies, its sharpness reduces with  
 199 increasing frequency, as can be observed in Figure 3. At frequencies greater than 10Hz, the kink at 105km  
 200 smoothen and the attenuation curves beyond 105km for frequencies greater than 10 Hz becomes flat as observed  
 201 in Figure 3. This change in the characteristics of the kink at higher frequency indicates that the arrival of waves  
 202 from the Moho also get attenuated more at higher frequencies in comparison to lower frequencies.

### 203 4.3 Quality factor ( $Q_s$ ) estimation

204 In order to estimate  $Q_s$ , inversion is repeated, however only considering records within hypocentral distance in  
 205 the range 15km to 105km, where a monotonic decrease in attenuation curves with hypocentral distance is  
 206 observed (see Figure 3). The attenuation curves are modelled in terms of geometric spreading [ $G(f, R_{ij})$ ] and  
 207 quality factor ( $Q$ ) in accordance with Castro et al., (1996) as;

$$208 \quad A(f, R_{ij}) = G(f, R_{ij}) \left[ e^{\frac{-\pi \cdot f \cdot R_{ij}}{Q \cdot \beta}} \right] \quad (3)$$

209 Where,  $f$  is the frequency and  $\beta$  is the mean shear wave velocity in the crustal medium taken as 3.5km/s as per  
 210 Mukhopadhyay and Kayal, (2003). Further,  $G(f, R_{ij})$  is considered as  $1/R_{ij}$  in accordance with Banerjee and  
 211 Kumar (2015) for this region. For each frequency considered in this study (see Table 4), Eq. (3) is linearized by  
 212 taking logarithm and corrected for the effect of  $G(f, R_{ij})$  as given in Eq. (4).

$$213 \quad \ln A(f, R_{ij}) = \ln G(f, R_{ij}) - \frac{\pi \cdot f}{Q \cdot \beta} R_{ij} \quad (4)$$

214 Ascribed to Castro et al., (2003), Eq. 4 is written in the form;

$$215 \quad a(R) = -m R \quad (5)$$

216 Where  $a(R)$  and  $m$  are given as;

$$217 \quad a(R) = \ln A(f, R_{ij}) - \ln G(f, R_{ij}) \quad (6)$$

$$218 \quad m = \frac{-\pi \cdot f}{Q \cdot \beta} \quad (7)$$

219 Where,  $m$  in Eq. 5 represents the slope between  $a(R)$  and  $R$  based on a linear least-square fit, obtained for each  
220 of the selected frequencies. Further, the  $Q$  values are estimated for the selected frequencies by substituting the  
221 value of  $m$  computed using Eq. (7). Columns 2 and 3, Table 4 list the value of  $m$  and  $Q$  with frequency ( $f$ )  
222 respectively. In order to build the frequency dependent relationship ( $Q_s = Q_0 f^n$ ), the value of  $Q$  is fitted as a  
223 function of frequency using a power law. In the above expression,  $n$  is the frequency dependent coefficient,  
224 which is approximately equal to 1 and varies on the basis of the heterogeneity of the medium (Aki 1980).  
225 Variation of  $Q$  against frequency as illustrated in Figure 4 gives frequency dependent  $Q_s$  for the north-west  
226 Himalayas as;

$$227 \quad Q_s = (105 \pm 11) f^{(0.94 \pm 0.08)} \quad (8)$$

228 Values of  $n$  and  $Q_0$  (in the expression  $Q_s = Q_0 f^n$ ) are attributed to the level of tectonic activity and degree of  
229 heterogeneity respectively, present in the region. Aki (1980) concluded higher values of  $n$  for tectonically active  
230 regions in comparison to that of stable regions. Similarly, low value of  $Q_0$  (<200) is an indication of larger  
231 degree of heterogeneities in the medium (Joshi 2006). The values of  $n$  (=0.94) and  $Q_0$  (=105), obtained in this  
232 study indicate that the present study region is tectonically active, characterized by higher degree of  
233 heterogeneities, in accordance with Aki (1980) and Joshi (2006).

#### 234 **4.4 Comparison with regional and global attenuation characteristics**

235 As discussed earlier, numerous studies exist where path attenuation of different parts of the present study area  
236 were attempted in the past. Comparison of present results with those obtained by the previous researchers for the  
237 northwest Himalaya and Delhi region are attempted as shown in Figure 5. It can be seen from Figure 5 that the  
238 attenuation curve obtained in the present study falls in between existing attenuation curves for the different parts  
239 of the north-west Himalaya as given in the literature, [Kinnaur, (Kumar et al., 2009), Kumoan (Mukhopadhyay  
240 et al., 2010), Garhwal regions (Negi et al., 2015) and Delhi (Sharma et al., 2015)]. It has to be highlighted here  
241 that the database for the present study also includes EQ records from Kinnaur, Kumoan, Garhwal regions of the  
242 north-west Himalayas as well as from regions in and around Delhi. For this reason, the value of  $Q_0$  and  $n$   
243 obtained in the present study reflects an average attenuation characteristics of regions encompassing north-west  
244 Himalaya up to Delhi region but within Indian boundary.

245 Furthermore, the attenuation results obtained in this study is compared with some typical results  
246 obtained globally in terms of attenuation characteristics and tectonic setting as shown in Figure 6. Literature  
247 suggests low values of  $Q_s$  for tectonically active regions [e.g. Kato Japan region (Yoshimoto et al., 1993); East  
248 central Iran (Mahood et al., 2009); Egypt (Abdel 2009); and Umbria–Marche region (Lorenzo et al., 2013)].



249 Similarly, relatively high values of  $Q_s$  were reported for tectonically stable areas [e.g. Baltic Shield (Kvamme  
 250 and Havskov 1989); Central South Korea (Kim et al., 2004) and South Eastern Korea (Chung and Sato 2001)].  
 251 Attenuation values obtained in the present study show good agreement with other studies having lower  $Q_s$   
 252 across the globe. Further, attenuation curves for the present region is also found closer to regions of high  
 253 seismicity like Umbria–Marche and Eastern Iran as can be observed from Figure 6.

## 254 5 Site Effects

255 After estimation of path parameter as discussed in the previous section, site characteristics of the recording  
 256 stations are determined in the second step of inversion. In addition to GINV, site components are also estimated  
 257 using HVSR method. Detailed discussion on GINV and HVSR is given in the subsequent sections.

### 258 5.1 GINV

259 GINV was developed by Andrews (1986) by improvising spectral ratio method. Since then, various forms of  
 260 this technique have been developed and used for estimating the seismic site characteristics by various  
 261 researchers (Castro et al., 1990; Boatwright et al., 1991; Oth et al., 2008 etc.). The methodology used for  
 262 estimating site characteristics in the present study is discussed here.

263 As per Iwata and Irikura (1988), the Fourier amplitude (acceleration) spectrum (FAS) of the  $i^{th}$  EQ  
 264 recorded, at the  $j^{th}$  recording station,  $U(f)_{ij}$  can be represented in the frequency domain as the product of  
 265 source term ( $S(f)_{ij}$ ), path attenuation ( $A(f)_{ij}$ ) and site term ( $G(f)_j$ ) as shown below;

$$266 \quad U(f)_{ij} = S(f)_{ij} A(f)_{ij} G(f)_j \quad (9)$$

267 Further, the path attenuation term can be removed from the spectral content of the record following Andrews  
 268 (1986) as;

$$269 \quad U^A(f)_{ij} = \frac{U(f)_{ij}}{A(f)_{ij}} = S(f)_{ij} G(f)_j \quad (10)$$

270 The value of  $A(f)_{ij}$  can be estimated using Eq. (3) and by considering  $Q_s$  as per Eq. (8), obtained in the earlier  
 271 section. Further, Eq. (10) can be linearized, by taking natural logarithms on both sides as per Andrews (1986)  
 272 giving;

$$273 \quad \ln U^A(f)_{ij} = \ln S(f)_i + \ln G(f)_j \quad (11)$$

274 Considering:  $\ln S_i = s_i(f)$ ,  $\ln G(f)_j = g(f)$  and  $\ln U^A(f)_{ij} = d_{ij}$ , Eq. (11) in the matrix form can be  
 275 written in accordance with Joshi et al., (2010) and following the notations of Menke (1989) as;

$$\begin{array}{ccccccc}
 \leftarrow & & 1^{\text{st}} \text{ event} & & \rightarrow & & \leftarrow & n^{\text{th}} \text{ event} & \rightarrow & \leftarrow \text{ Site effect} \rightarrow \\
 & 1 & 2 & \dots & m & & 1 & 2 & \dots & m & & 1 & 2 & \dots & m \\
 \left| \begin{array}{cccccccc}
 1 & 0 & \dots & 0 & \dots & 0 & 0 & & 0 & 1 & 0 & \dots & 0 \\
 0 & 1 & & 0 & \dots & 0 & 0 & & 0 & 0 & 1 & \dots & 0 \\
 \vdots & & & \vdots & & \vdots & \vdots & & \vdots & \vdots & \vdots & & \vdots \\
 \vdots & & & \vdots & & \vdots & \vdots & & \vdots & \vdots & \vdots & & \vdots \\
 0 & 0 & 0 & 1 & & 0 & 0 & \dots & 0 & 0 & 0 & \dots & 1
 \end{array} \right| & \left| \begin{array}{c} s_1(f_1) \\ \vdots \\ \vdots \\ \vdots \\ s_1(f_n) \\ s_n(f_1) \end{array} \right| & = & \left| \begin{array}{c} d_1(f_1) \\ \vdots \\ \vdots \\ \vdots \\ d_1(f_m) \end{array} \right|
 \end{array}$$

|                                |   |     |   |       |   |   |     |   |   |   |     |   |            |            |
|--------------------------------|---|-----|---|-------|---|---|-----|---|---|---|-----|---|------------|------------|
| For $n^{\text{th}}$ earthquake |   |     |   |       |   |   |     |   |   |   | :   |   |            |            |
| 0                              | 0 | ... | 0 | ..... | 1 |   | ... | 0 | 1 | 0 | ... | 0 | $s_n(f_n)$ | $d_n(f_m)$ |
| 0                              | 0 | ... | 0 | ..... | 0 | 1 | ... | 0 | 0 | 1 | ... | 0 | $g(f_1)$   | $d_n(f_m)$ |
| :                              | : |     | : |       | : | : |     | : | : | : |     | : | $g(f_2)$   | :          |
| :                              | : |     | : |       | : | : |     | : | : | : |     | : | :          | :          |
| 0                              | 0 | ... | 0 | ...   | 0 | 0 | ... | 1 | 0 | 0 | ... | 1 | $g(f_m)$   | $d_n(f_m)$ |

276 (12)

277 The matrix form in Eq. (12) represents a purely under determinate system since there are  $(n + 1) \times m$   
278 parameters for ' $m \times n$ ' data (here  $m$  is the number of sample frequency and  $n$  is the number of EQs recorded at  
279 a particular recording station). In here, Eq. (12) is solved using Moore- Penrose matrix inversion procedure  
280 (minimum norm inversion) given by Penrose, (1955) to determine  $g(f)_j$  at each of the recording station.

281 Based on the above discussed methodology, inversions are performed for east-west, north-south and  
282 vertical components of EQ records separately to obtain the amplification curves in the frequency range of  
283 0.25Hz to 15Hz, for each of the three components. For further calculation, the horizontal component is obtained  
284 as the geometric mean of east-west and north-south components.

## 285 5.2 HVSR

286 HVSR method is an extension of Nakamura (1989) technique, which is widely to assess the subsoil  
287 characteristics using recorded ambient noises. Nakamura (1989) technique is based on the assumption that the  
288 soil amplification effects are retained only in the horizontal component whereas the source and the path effects  
289 are maintained both in vertical as well as horizontal components of ground motion. Hence, the ratio of  
290 horizontal and vertical components gives an estimate of site amplification. Lermo and Chavez-Garccia (1993)  
291 extended Nakamura (1989) technique to S wave part of the accelerograms and studied the theoretical basis of  
292 the technique by numerical modelling oSV waves. Later, HVSR method was applied to EQ recordings  
293 worldwide (Luzi et al., 2011; Yaghmaei-Sabegh and Tsang 2011; D'Alessandro et al., 2012; Harinarayan and  
294 Kumar 2017a, b, 2018 etc.) to obtain the site characteristics.

295 Comparative studies between HVSR and other methods of evaluating site parameters reported by Field and  
296 Jacob (1995), Parolai et al., (2004), Shoji and Kamiyama (2002) Harinarayan and Kumar (2017b) etc. show that,  
297 HVSR can provide good and reliable estimate of predominant frequency. However, the above literatures also  
298 point out discrepancies in amplification levels obtained from HVSR with other methods. In order to compare the  
299 site amplification functions obtained from HVSR and GINV methods, HVSR for each station is computed  
300 considering the same S wave window as used in the GINV method. HVSR for each recording station is  
301 determined using the following steps;

302 1. Calculate the response spectra considering 5% damping, for all the three components (north-south, east-  
303 west and vertical) of ground motion records.

304 2. Obtain the geometric mean of the two horizontal response spectra components (H) using Eq. (13) given  
305 below;

$$306 \quad H = (H_{EW} \times H_{NS})^{0.5} \quad (13)$$

307 3. Calculate the ratio of  $H$  to  $V$  ( $H/V$ ).

308 Where,  $H_{EW}$  and  $H_{NS}$  are the response spectrum of the horizontal east-west and north-south components  
309 respectively and  $V$  is the response spectrum corresponding to vertical component of ground motion. Then, the  
310 HVSR at each of the recording station can be estimated as;

$$311 \quad (HVS\!R)_i = \frac{\sum_{i=1}^{N_i} \frac{H}{V}}{N_i} \quad (14)$$

312 Here,  $N_i$  is the number of events recorded at recording station “ $i$ ” and  $(HVS\!R)_i$  indicates the average HVSR  
313 value for a particular recording station “ $i$ ”. The  $f_{\text{peak}}$  is the value of frequency corresponding to a maximum  
314 value of  $(HVS\!R)_i$  (denoted by  $A_{\text{peak}}$ ) at the recording station “ $i$ ”.

### 315 5.3 Site Parameters

316 Site amplitude (SA) curves are developed using GINV for the horizontal (GINV H) and the vertical components  
317 (GINV V). Figure 7 shows typical amplification curves obtained for GINV H (indicated by dashed lines) and  
318 GINV V (indicated by firm lines) for typical 6 recording stations. In general, obtained amplification values for  
319 GINV H is greater than GINV V for all frequencies. A typical observation (from Figure 7) for both GINV H and  
320 GINV V is that the high level of amplification is observed at high frequencies. For several recording stations,  
321 clear and distinct peak in the amplification curve can be observed (e.g. JAMI, BAR, GHA and SND) from  
322 Figure 7. Moreover, the overall peaks of the GINV V component are usually at higher frequencies than for the  
323 GINV H component. Further, in case of few recording stations, the shift in frequency is relatively close to a  
324 factor  $\sqrt{2}$  (eg. BAR and GHA). Next, Site amplification factor (SAF) is estimated based on the GINV results  
325 (denoted by GINV H/V) as the ratio of GINV H to GINV V. The value of frequency corresponding to the  
326 maximum value of SAF (denoted as  $A_{\text{peak}}$ ) is  $f_{\text{peak}}$ . GINV H/V curves are compared with those estimated using  
327 HVSR method for a total of 101 recording stations. Figure 8 shows the comparison of the HVSR (indicated by  
328 dashed lines) and GINV H/V (indicated by firm line) for typical 9 recording stations from above analyses. A  
329 general observation made from Figure 8 is that both HVSR and GINV H/V show similar SAF patterns for all  
330 recoding stations in the selected frequency range. Overall value of  $f_{\text{peak}}$  obtained exhibit 1:1 matching between  
331 the two methods. However, there is trend of difference in terms of  $A_{\text{peak}}$  values.  $A_{\text{peak}}$  values obtained using  
332 HVSR are found higher compared to those obtained using GINV H/V curves. This observation is also reported  
333 in other regions (Sharma et al., 2014; Field and Jacob, 1995). The values of  $f_{\text{peak}}$  obtained using GINV H/V and  
334 HVSR are tabulated in Column 5 and 7, Table 1 respectively. Similarly, the values of  $A_{\text{peak}}$  obtained using  
335 GINV H/V and HVSR are tabulated in Column 6 and 8, Table 1 respectively. The maximum value of  $f_{\text{peak}}$  of  
336 15Hz is observed for the recording station GGI with a value of  $A_{\text{peak}}$  of 5.3 based on GINV H/V. The maximum  
337 value of  $A_{\text{peak}}$  of 12.2, based on GINV H/V is observed for ADIB recording station at 6.3Hz. The range of  $A_{\text{peak}}$   
338 based on HVSR varies between 1.7 and 19.4, while based on GINV H/V, the range of  $A_{\text{peak}}$  varies between 1.5

339 and 12.7. Similarly, of the  $f_{peak}$  based on HVSR varies between 0.4Hz and 10Hz, while based on GINV H/V, the  
340  $f_{peak}$  varies between 0.5Hz and 15Hz.

341 Further, based on the value of  $f_{peak}$  obtained above, using GINV, the recording stations are classified as  
342 either rock sites or soil sites. In general, criteria based on average shear wave velocity over 30m ( $V_{s30}$ ) is used  
343 for site classification. A site can also be classified based on  $f_{peak}$  values. Such an approach was used by  
344 Harinarayan and Kumar (2018) to classify the recording stations in the north-west Himalaya based on  $f_{peak}$   
345 obtained using HVSR method, where stations having  $f_{peak}$  less than 6.35Hz were classified as soil sites and  
346 stations having  $f_{peak}$  greater than 6.35Hz were classified as rock sites. The range of  $f_{peak}$  values reported by  
347 Harinarayan and Kumar (2018) for soil and rock sites were calculated based on the range of  $V_{s30}$  based on  
348 NEHRP site classification scheme (BSSC, 2003) in accordance with the Eq. (15) (Kramer, 1996), correlating  
349  $f_{peak}$  to soil depth (denoted by H and taken as 30m) and shear wave velocity ( $V_z$ ).

$$350 \quad f_{peak} = \frac{V_z}{4H} \quad (15)$$

351 Based on NEHRP classification criteria (BSSC, 2003), all the recording stations in the present are classified as  
352 either rock site or soil site as given in Column 9, Table 1. Out of 101 recording stations 10 recording stations are  
353 classified as rock sites and the rest 91 recording stations are classified as soil sites.

#### 354 **5.5 Relationship between GINV H/V results and $V_{s30}$**

355 The value of  $V_{s30}$  are available for 8 recording stations in Tarai region of Uttarakhand and 19 stations in Delhi  
356 region from Pandey et al., (2016a) and Pandey et al., (2016b) respectively based on MASW test. These 27  
357 recording stations coincides with recording stations where  $A_{peak}$  and  $f_{peak}$  are determined in the present study.  
358  $V_{s30}$  (obtained from Pandey et al., 2016 a, b),  $f_{peak}$  and  $A_{peak}$  (as per present work) for above 27 recording stations  
359 are listed in Table 5. Based on the present findings, relationship between  $f_{peak}$  and  $V_{s30}$  for the 27 recording  
360 stations is proposed as shown in Figure 9a having  $R^2=0.71$  as;

$$361 \quad \log V_{s30} = (0.48)(\log f_{peak}) + (2.33) \quad (16)$$

362 Similarly, the relationship between  $A_{peak}$  and  $V_{s30}$  for above 27 recording stations, as obtained in the present  
363 study (see Figure 9b) is as follows;

$$364 \quad \log V_{s30} = -(0.74)(\log A_{peak}) + (2.93) \quad (17)$$

365 A lack of correlation (correlation coefficient =0.47) between  $V_{s30}$  and  $A_{peak}$  is observed as shown in Figure 9b,  
366 which is also reported in the previous studies like Dutta et al., (2001), (2003) and Hassani et al., (2011). It can  
367 be concluded from the proposed correlations (Eqs. 16 and 17) that the value of  $f_{peak}$  increases with increase in  
368  $V_{s30}$  whereas the value of  $A_{peak}$  decreases with the increase in  $V_{s30}$ . It has to be highlighted here that both the  
369 equations [Eqs. 16 and 17] are applicable for sites having  $f_{peak}$  in the range 1.8 to 6 Hz, and  $A_{peak}$  in the range 2  
370 to 6.9.

#### 371 **Conclusion**

372 In the light of on-going seismicity and catastrophic damages witnessed in the past, determination of path  
373 attenuation as well as site characterization of EQ recording stations of PESMOS located in the north-west  
374 Himalayas and adjoining area is attempted. EQ recorded between 2004 and 2017 are used in the analyses based  
375 on two-step inversion. While determining path attenuation, a kink at 105km hypocentral distance is observed in  
376 this work. Referring to similar observations from other regions, presence of Moho discontinuity is proposed in  
377 the region. This finding can be validated based on detailed study and is beyond the scope of present work  
378 objective. Further, based on attenuation curve obtained till 105km hypocentral distance and over wide range of  
379 frequencies,  $Q_s = (105 \pm 11) f^{(0.94 \pm 0.08)}$  is obtained for the present study area, clearly indicating that the  
380 region is heterogeneous and seismically active.

381 In absence of proper geological information of PESMOS recording stations as highlighted by numerous  
382 recent studies, site classification of all the recording stations considered in this study are done based on GINV  
383 and HVSR. Based on this analysis, out of 101 recording stations, 10 are found to be located on rock while 91  
384 stations are found to be located on soil sites. 1:1 matching for all the recording station from GINV and HVSR  
385 further enhances the confidence on present findings. Based on the findings, two empirical correlations for  $A_{\text{peak}}$   
386 and  $f_{\text{peak}}$  with  $V_{s30}$ , are proposed.

387 Path attenuation and site characteristics are the key factors to be used for developing regional ground  
388 motion model. Further, with EQ catalogue known, present findings can be used for detailed seismic hazard  
389 assessment of the study area. In addition, identifying recording station whether considered recording stations are  
390 located on rock sites or soil sites will help in utilizing ground motion records for scenario based seismic hazard  
391 assessment.

392  
393

#### 394 **Authors Contribution:**

395 Harinarayan N H developed code generalized inversion, analyzed the records and all relevant literature review.  
396 Kumar Abhishek (AK) highlighted the importance of site characterization for PESMOS recording stations and  
397 need for the study.

#### 398 **Acknowledgement**

399 The authors would like to thank the INSPIRE Faculty program by the Department of Science and Technology  
400 (DST), Government of India for the funding project ‘‘Propagation path characterization and determination of in-  
401 situ slips along different active faults in the Shillong Plateau’’ ref. no. DST/INSPIRE/04/2014/002617 [IFA14-  
402 ENG-104] for providing necessary funding and motivation for the present study.

#### 403 **Reference**

404 Abdel-Fattah, A. K.: Attenuation of body waves in the crust beneath the vicinity of Cairo Metropolitan area  
405 (Egypt) using coda normalization method, *Geophys. J. Int.*, 176(1), 126-134, 2009.  
406 Aki, K.: Attenuation of shear-waves in the lithosphere for frequencies from 0.05 to 25 Hz, *Phys. Earth Planet.*  
407 *Inter.*, 21, 50–60, 1980.  
408 [D’Alessandro, C., Bonilla, L.F., Boore, D.M., Rovelli, A., and Scotti, O.: Predominant-period site classification  
409 for response spectra prediction equations in Italy, \*Bull. Seismol. Soc. Am.\*, 102\(2\), 680–695, 2012.](#)

410 Ameri, G., Oth, A., Pilz, M., Bindi, D., Parolai, S., Luzi, L. and Cultrera, G.: Separation of source and site  
411 effects by generalized inversion technique using the aftershock recordings of the 2009 L'Aquila earthquake,  
412 *Bull. of Earthquake Eng.*, 9(3), 717-739, 2011.

413 Andrews, D. J.: Objective determination of source parameters and similarity of earthquakes of different size,  
414 *Earthquake source mechanics*, 259-267, 1986.

415 Banerjee, S., Kumar, A.: Determination of seismic wave attenuation for the Garhwal Himalayas, India. *Geosci*  
416 *Res* 2(2):105–126, 2017.

417 Baro, O., Kumar, A., and Zadeh, A.S.: Seismic hazard assessment of the Shillong Plateau, India, *Geomatics*,  
418 *Nat. Hazards and Risk*, 9:1, 841-861, 2018.

419 Bilham, R., Larson, K., and Freymueller, J.: GPS measurements of present-day convergence across the Nepal  
420 Himalaya, *Nature*, 386(6620), 61, 1997.

421 Bindi, D., Castro, R. R., Franceschina, G., Luzi, L., and Pacor, F.: The 1997–1998 Umbria- Marche sequence  
422 (central Italy): Source, path, and site effects estimated from strong motion data recorded in the epicentral area, *J.*  
423 *Geophys. Res. B: Solid Earth*, 109(B4), 2004.

424 Bindi, D., Pacor, F., Luzi, L., Massa, M., and Ameri, G.: The M w 6.3, 2009 L'Aquila earthquake: source, path  
425 and site effects from spectral analysis of strong motion data, *Geophys. J. Int.*, 179(3), 1573-1579, 2009.

426 BSSC (2003). Building Seismic Safety Council, NEHRP recommended provisions for seismic regulations for  
427 new buildings and other structures. Report FEMA-450 (Provisions), Federal Emergency Management Agency  
428 (FEMA), Washington.

429 Boatwright, J., Fletcher, J. B., and Fumal, T. E.: A general inversion scheme for source, site, and propagation  
430 characteristics using multiply recorded sets of moderate-sized earthquakes, *Bull. Seismol. Soc. Am.*, 81(5),  
431 1754-1782, 1991.

432 Castro, R. R., Anderson, J. G., and Singh, S. K.: Site response, attenuation and source spectra of S waves along  
433 the Guerrero, Mexico, subduction zone, *Bull. Seismol. Soc. Am.*, 80(6A), 1481-1503, 1990.

434 Castro, R. R., Fabriol, H., Bour, M., and Le Brun, B.: Attenuation and site effects in the region of Guadeloupe,  
435 Lesser Antilles, *Bull. Seismol. Soc. Am.*, 93(2), 612-626, 2003.

436 Castro, R. R., Pacor, F., Sala, A., and Petrongaro, C.: S wave attenuation and site effects in the region of Friuli,  
437 Italy, *J. Geophys. Res. B: Solid Earth*, 101(B10), 22355-22369, 1996.

438 Chung, T. W., and Sato, H.: Attenuation of high-frequency P and S waves in the crust of southeastern South  
439 Korea, *Bull. Seismol. Soc. Am.*, 91(6), 1867-1874, 2001.

440 De Lorenzo, S., Del Pezzo, E., and Bianco, F.: Q<sub>c</sub>, Q<sub>β</sub>, Q<sub>i</sub> and Q<sub>s</sub> attenuation parameters in the Umbria–Marche  
441 (Italy) region, *Phys. Earth Planet. Inter.* 218, 19-30, 2013.

442 Dutta, U., Biswas, N., Martirosyan, A., Papageorgiou, A., and Kinoshita, S.: Estimation of earthquake source  
443 parameters and site response in Anchorage, Alaska from strong-motion network data using generalized  
444 inversion method, *Phys. Earth Planet. Inter.*, 137(1-4), 13-29, 2003.

445 Geological Survey of India (GSI) (1998) Geological maps of India. Geological Survey of India, Kolkata

446 Harinarayan, N. H., and Kumar, A.: Site classification of the strong motion stations of Uttarakhand, India,  
447 Based on the model horizontal to vertical spectral ratio, *Geotechnical Frontiers*, 141-149, 2017 a.

448 Harinarayan, N. H., and Kumar, A.: Seismic Site Classification of Recording Stations in Tarai Region of  
449 Uttarakhand, from Multiple Approaches, *Geotech. Geol. Eng.*, 1-16, 2017 b.

450 Harinarayan, N. H., and Kumar, A.: Determination of NEHRP Site Class of Seismic Recording Stations in the  
451 Northwest Himalayas and Its Adjoining Area Using HVSR Method, *Pure Appl. Geophys.*, 175(1), 89-107,  
452 2018.

453 Hartzell, S. H.: Site response estimation from earthquake data, *Bull. Seismol. Soc. Am.*, 82(6), 2308-2327.  
454 1992.

455 Hassani, B., Zafarani, H., Farjoodi, J., and Ansari, A.: Estimation of site amplification, attenuation and source  
456 spectra of S-waves in the East-Central Iran, *Soil Dyn. Earthquake Eng.*, 31(10), 1397-1413, 2011.

457 IS 1893: Part 1–2016. Indian standard criteria for earthquake resistant design of structures—part 1: General  
458 Provisions and Buildings, Bureau of Indian Standards, New Delhi, India.

459 Iwata, T., Irikura, K.: Source parameters of the 1983 Japan Sea earthquake sequence, *J. of Physics of the Earth*,  
460 36(4), 155-184, 1988.

461 Joshi, A., Mohanty, M., Bansal, A. R., Dimri, V. P., and Chadha, R. K.: Use of spectral acceleration data for  
462 determination of three-dimensional attenuation structure in the Pithoragarh region of Kumaon Himalaya, *J.*  
463 *Seismolog.*, 14(2), 247-272, 2010.

464 Joshi, A.: Use of acceleration spectra for determining the frequency-dependent attenuation coefficient and  
465 source parameters, *Bull. Seismol. Soc. Am.*, 96(6), 2165-2180, 2006.

466 Kim, K. D., Chung, T. W., and Kyung, J. B.: Attenuation of high-frequency P and S waves in the crust of  
467 Choongchung provinces, central South Korea, *Bull. Seismol. Soc. Am.*, 94(3), 1070-1078, 2004.

468 Konno, K., and Ohmachi, T.: Ground-motion characteristics estimated from spectral ratio between horizontal  
469 and vertical components of microtremor, *Bull. Seismol. Soc. Am.*, 88(1), 228-241, 1998.

470 Kumar, A., Mittal, H., Sachdeva, R., and Kumar, A.: Indian strong motion instrumentation network, *Seismol.*  
471 *Res. Lett.*, 83(1), 59-66, 2012.

472 Kumar, N., Sharma, J., Arora, B. R., and Mukhopadhyay, S.: Seismotectonic model of the Kangra–Chamba  
473 sector of northwest Himalaya: Constraints from joint hypocenter determination and focal mechanism, *Bull.*  
474 *Seismol. Soc. Am.*, 99(1), 95-109, 2009.

475 Kvamme, L. B., and Havskov, J.: Q in southern Norway, *Bull. Seismol. Soc. Am.*, 79(5), 1575-1588, 1989.

476 Lermo, J., and Chávez-García, F. J.: Site effect evaluation using spectral ratios with only one station. *Bull.*  
477 *Seismol. Soc. Am.*, 83(5), 1574-1594, 1993.

478 Luzi, L., Puglia, R., Pacor, F., Gallipoli, M.R., Bindi D, and Mucciarelli, M.: Proposal for a soil classification  
479 based on parameters alternative or complementary to Vs30, *Bull. Seismol. Soc. Am.*, 9(6), 1877-1898, 2011.

480 Ma'hood, M., Hamzehloo, H., and Doloei, G. J.: Attenuation of high frequency P and S waves in the crust of the  
481 East-Central Iran, *Geophys. J. Int.*, 179(3), 1669-1678, 2009.

482 Mahajan, A.K. and Kumar, S.K.: Macroseismic field observations of January 26th, 2001 Kachchh earthquake  
483 and its seismotectonics, *J. Asian Earth Sci.*, 23: 17–23, 2004.

484 Menke, W.: *Geophysical data analysis: discrete inverse theory: MATLAB edition (Vol. 45)*. Academic press,  
485 2012.

486 Mukhopadhyay, S., and Kayal, J. R.: Seismic tomography structure of the 1999 Chamoli earthquake source area  
487 in the Garhwal Himalaya, *Bull. Seismol. Soc. Am.*, 93(4), 1854-1861, 2003.

488 Mukhopadhyay, S., Sharma, J., Del-Pezzo, E., and Kumar, N.: Study of attenuation mechanism for Garwhal–  
489 Kumaun Himalayas from analysis of coda of local earthquakes, *Phys. Earth Planet. Inter.*, 180(1-2), 7-15, 2010.

490 Nakamura, Y.: A method for dynamic characteristics estimation of subsurface using microtremor on the ground  
491 surface, Railway Technical Research Institute, Quarterly Reports, 30(1), 1989.

492 Nath, S. K., Sengupta, P., and Kayal, J. R.: Determination of S-wave site response in the Garhwal Himalaya  
493 from the aftershock sequence of the 1999 Chamoli earthquake, Bull. Seismol. Soc. Am., 92(3), 1072-1081,  
494 2002.

495 Negi, S. S., Paul, A., and Joshi, A.: Body wave crustal attenuation characteristics in the Garhwal Himalaya,  
496 India, Pure Appl. Geophys., 172(6), 1451-1469, 2015.

497 Oth, A., Bindi, D., Parolai, S., and Di, Giacomo, D.: Spectral Analysis of K-NET and KiK-net Data in Japan,  
498 Part II: On Attenuation Characteristics, Source Spectra, and Site Response of Borehole and Surface  
499 Stations Spectral Analysis of K-NET and KiK-net Data in Japan, Part II, Bull. Seismol. Soc. Am., 101(2), 667-  
500 687, 2011.

501 Oth, A., Bindi, D., Parolai, S., and Wenzel, F.: S-wave attenuation characteristics beneath the Vrancea region in  
502 Romania: new insights from the inversion of ground-motion spectra, Bull. Seismol. Soc. Am., 98(5), 2482-  
503 2497, 2008.

504 Oth, A., Parolai, S., Bindi, D., and Wenzel, F.: Source spectra and site response from S waves of intermediate-  
505 depth Vrancea, Romania, earthquakes, Bull. Seismol. Soc. Am., 99(1), 235-254, 2009.

506 Pandey, B., Jakka, R. S., and Kumar, A.: Influence of local site conditions on strong ground motion  
507 characteristics at Tarai region of Uttarakhand, India, Nat. Hazards, 81(2), 1073-1089, 2016 a.

508 Pandey, B., Jakka, R. S., Kumar, A., and Mittal, H.: Site Characterization of Strong- Motion Recording Stations  
509 of Delhi Using Joint Inversion of Phase Velocity Dispersion and H/V Curve. Bull. Seismol. Soc. Am., 106(3),  
510 1254-1266, 2016 b.

511 Parolai, S., Bindi, D., Baumbach, M., Grosser, H., Milkereit, C., Karakisa, S., and Zünbül, S.: Comparison of  
512 different site response estimation techniques using aftershocks of the 1999 Izmit earthquake, Bull. Seismol. Soc.  
513 Am., 94(3), 1096-1108, 2004.

514 Penrose, R.: A Generalized Inverse for Matrices, Proc. Cambridge Phil. Soc. 51, 406-413, 1955.

515 Philip, G., Suresh, N., and Bhakuni, S.S.: Active tectonics in the northwestern outer Himalaya: evidence of  
516 large-magnitude palaeoearthquakes in Pinjaur Dun and the Frontal Himalaya, Current Science, 106, 211–222,  
517 2014.

518 Saikia, S., Chopra, S., Baruah, S., Baidya, P. R., and Singh, U.K.: Crustal imaging of the Northwest Himalaya  
519 and its foredeep region from teleseismic events, Geomat Nat. Haz. Risk Journal, 7(4), 1265-1286, 2016.

520 Sarkar, I., Pachauri, A.K. and Israil, M.: On the damage caused by the Chamoli earthquake of 29 March, 1999,  
521 J. Asian Earth Sci., 19: 129–134, 2001.

522 Sharma, B., Chingtham, P., Sutar, A. K., Chopra, S., and Shukla, H.P.: Frequency dependent attenuation of  
523 seismic waves for Delhi and surrounding area, India, Ann. Geophys., 58(2), 0216, 2015.

524 Sharma, J., Chopra, S., and Roy, K. S.: Estimation of source parameters, quality factor (QS), and site  
525 characteristics using accelerograms: Uttarakhand Himalaya region, Bull. Seismol. Soc. Am., 104(1), 360-380,  
526 2013.

527 Shoji, Y., and Kamiyama, M.: Estimation of local site effects by a generalized inversion scheme using observed  
528 records of ‘Small-Titan’, Soil Dyn. Earthq. Eng., 22(9), 855-864, 2002.



529 Singh, C., Singh, A., Bharathi, V. S., Bansal, A. R., and Chadha, R. K.: Frequency-dependent body wave  
530 attenuation characteristics in the Kumaun Himalaya, *Tectonophysics*, 524, 37-42, 2012.

531 Srivastava, H.N., Bansal, B.K., and Verma, M.: Largest earthquake in Himalaya: An appraisal, *J. Geol. Soc.*  
532 *India*, 82, 15–22, 2013.

533 Tripathi, J. N., Singh, P., and Sharma, M. L.: Attenuation of high-frequency P and S waves in Garhwal  
534 Himalaya, India, *Tectonophysics*, 636, 216-227, 2014.

535 Valdiya, K.S.: *Aspects of Tectonics, Focus on south-central Asia*, Tata McGraw-Hill Publishing Company Ltd.,  
536 New Delhi, 319, 1984.

537 Yaghmaei-Sabegh, S.: Characteristics of near-source ground motions from the 2012 Varzaghan-Ahar double  
538 Earthquakes, Northwest of Iran, *Nat. Hazards*, 70, 1077–1097, 2014.

539 Yoshimoto, K., Sato, H., and Ohtake, M.: Frequency-dependent attenuation of P and S waves in the Kanto area,  
540 Japan, based on the coda-normalization method, *Geophys. J. Int.*, 114(1), 165-174, 1993.

541

542 **Appendix A**

543 In the matrix form, following the notations of Menke (1989) and incorporating the weighting factors  
544  $w_1$  and  $w_2$ , Eq. (1) can be written in accordance with Castro et al., (1990) as:

545

$$\begin{array}{cccc|cccc|}
 & \text{(A)} & & & & \text{(X)} & & \text{(b)} \\
 \left[ \begin{array}{cccc}
 1 & 0 & 0 & \dots \\
 0 & 1 & 0 & \dots \\
 \cdot & \cdot & \cdot & \dots \\
 1 & 0 & 0 & \dots \\
 \cdot & \cdot & \cdot & \dots \\
 \cdot & \cdot & \cdot & \dots \\
 \cdot & \cdot & \cdot & \dots \\
 w_1 & 0 & 0 & \dots \\
 -w_2/2 & w_2 & -w_2/2 & \dots \\
 0 & -w_2/2 & w_2 & -w_2/2 \\
 \cdot & \cdot & \cdot & \dots
 \end{array} \right]
 \left[ \begin{array}{cccc}
 1 & 0 & 0 & \dots \\
 1 & 0 & 0 & \dots \\
 \cdot & \cdot & \cdot & \dots \\
 0 & 1 & 0 & \dots \\
 0 & 1 & 0 & \dots \\
 \cdot & \cdot & \cdot & \dots
 \end{array} \right]
 =
 \left[ \begin{array}{c}
 \ln A_1 \\
 \cdot \\
 \cdot \\
 \cdot \\
 \ln A_{10} \\
 \cdot \\
 \ln M_1 \\
 \cdot \\
 \cdot \\
 \cdot \\
 \cdot \\
 \ln M_N \\
 \cdot
 \end{array} \right]
 \left[ \begin{array}{c}
 \ln U_{11} \\
 \cdot \\
 \cdot \\
 \ln U_{ij} \\
 \cdot \\
 \cdot \\
 0 \\
 0 \\
 0 \\
 0 \\
 \cdot
 \end{array} \right]
 \tag{A1}$$

546

547 The hypocentral distances of the data set is discretized into number of bins of equal widths and the value of  
548  $A(f, R_{ij})$  is computed at each bin. The width of the bins are selected such that there is almost equal number of  
549 data points in every bin. Further,  $\ln A(f, R_{ij})$  versus hypocentral distance curves at each of the selected  
550 frequencies are computed solving Eq. (2) in a least square sense, using singular value decomposition method  
551 (Menke, 1989).

552

553

**FIGURES**

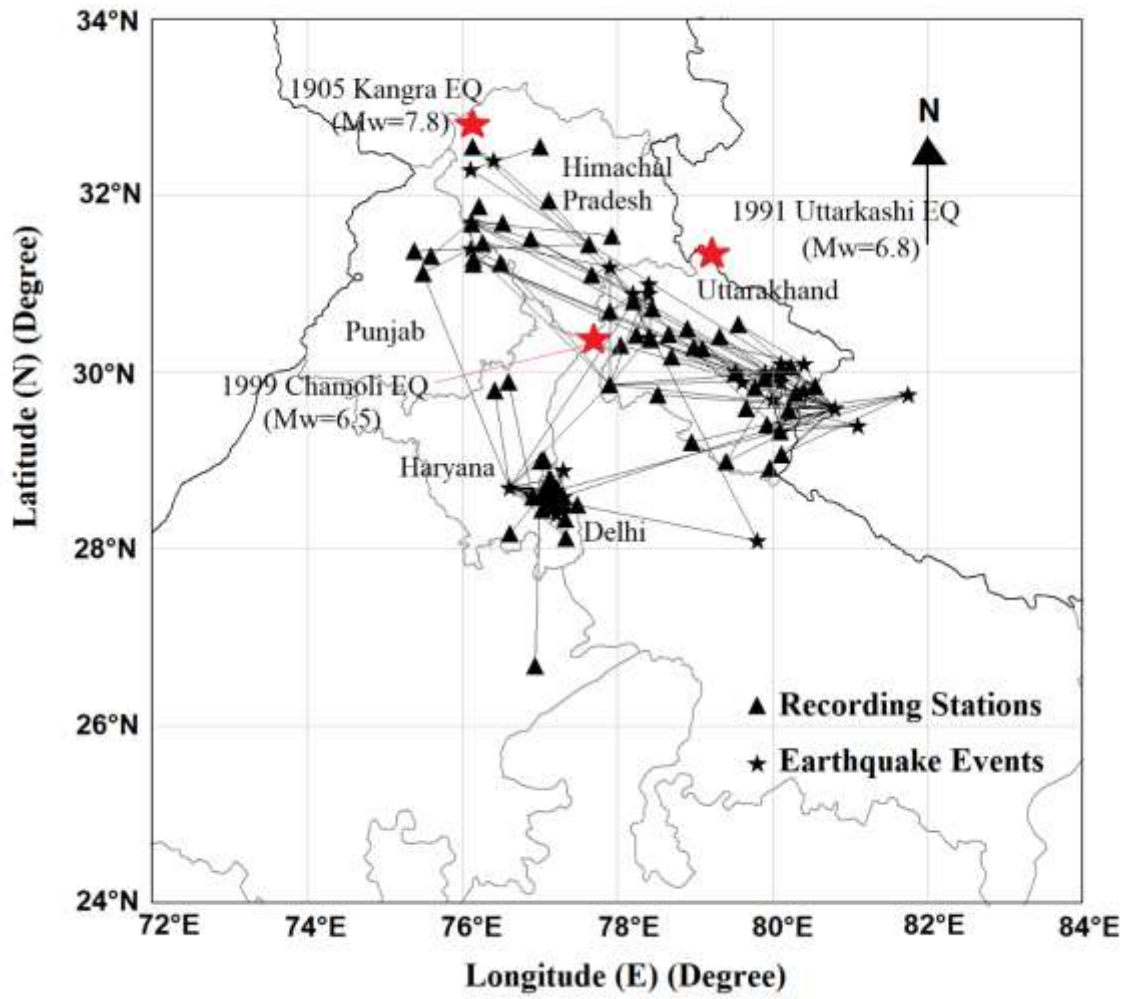

555

556

Figure 1: Map of the region under study with EQs (stars), recording stations (triangles), and paths (solid-lines).

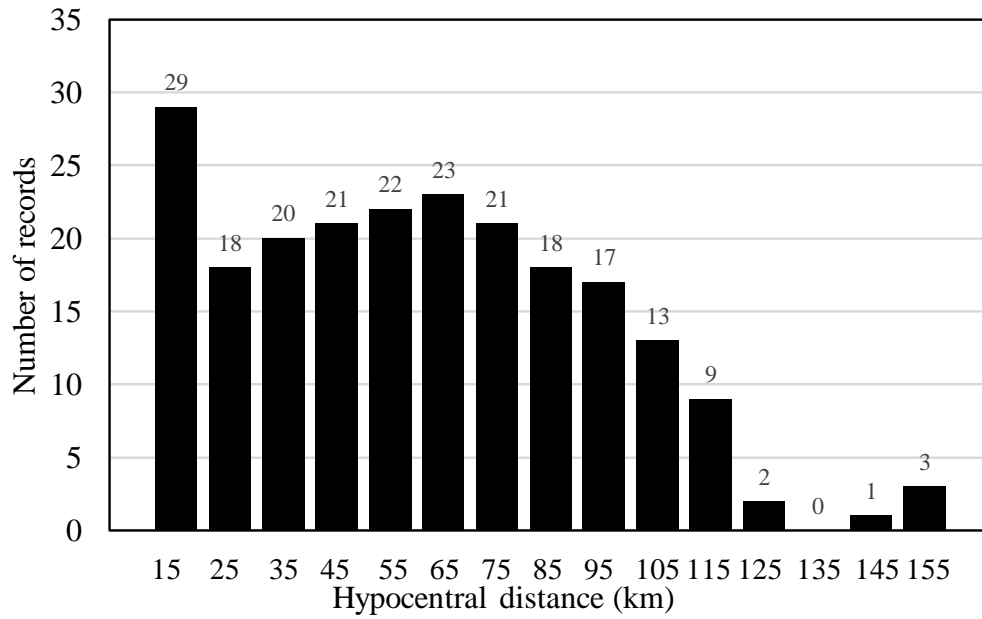

557  
558

Figure 2: Distribution of hypocentral distances in the data set.

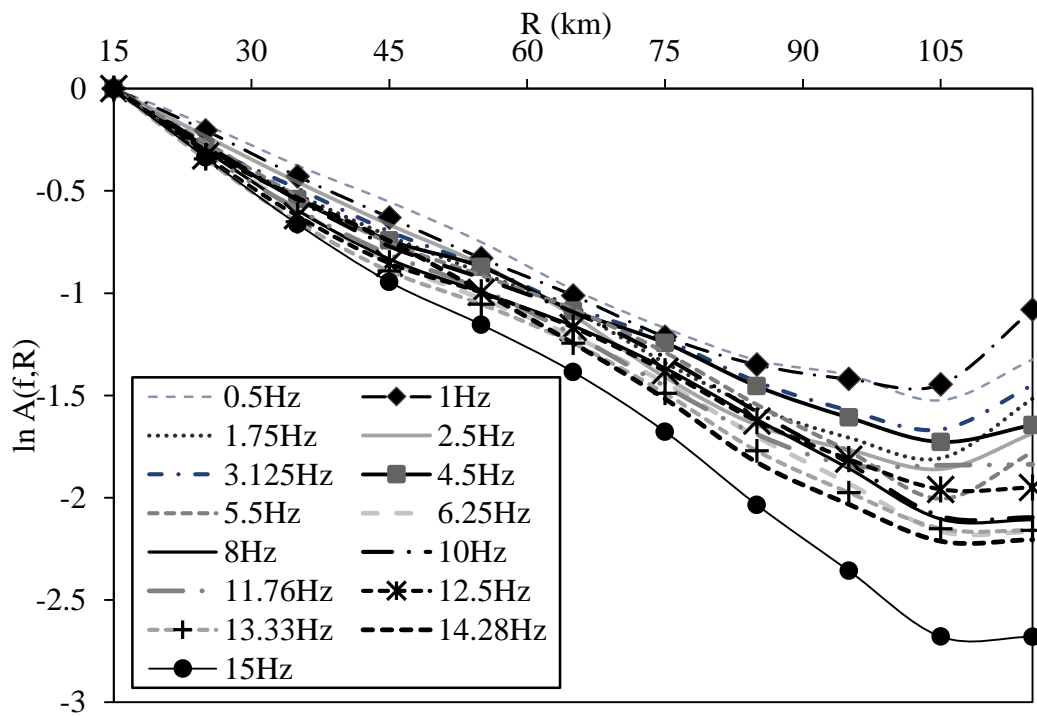

559  
560

Figure 3: S wave spectral attenuation versus hypocentral distance. Note that  $\ln A(f, R_0)$  at reference distance is zero.

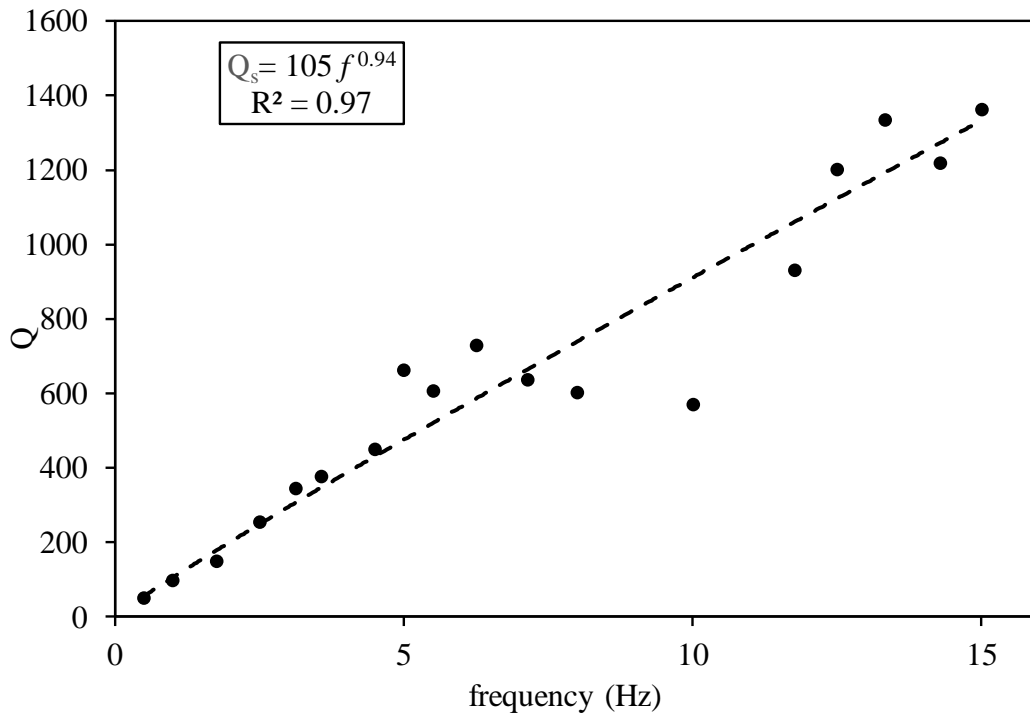

561

562

Figure 4: Frequency dependence of the quality factor  $Q$  for hypocentral distances between 15 km to 105 km

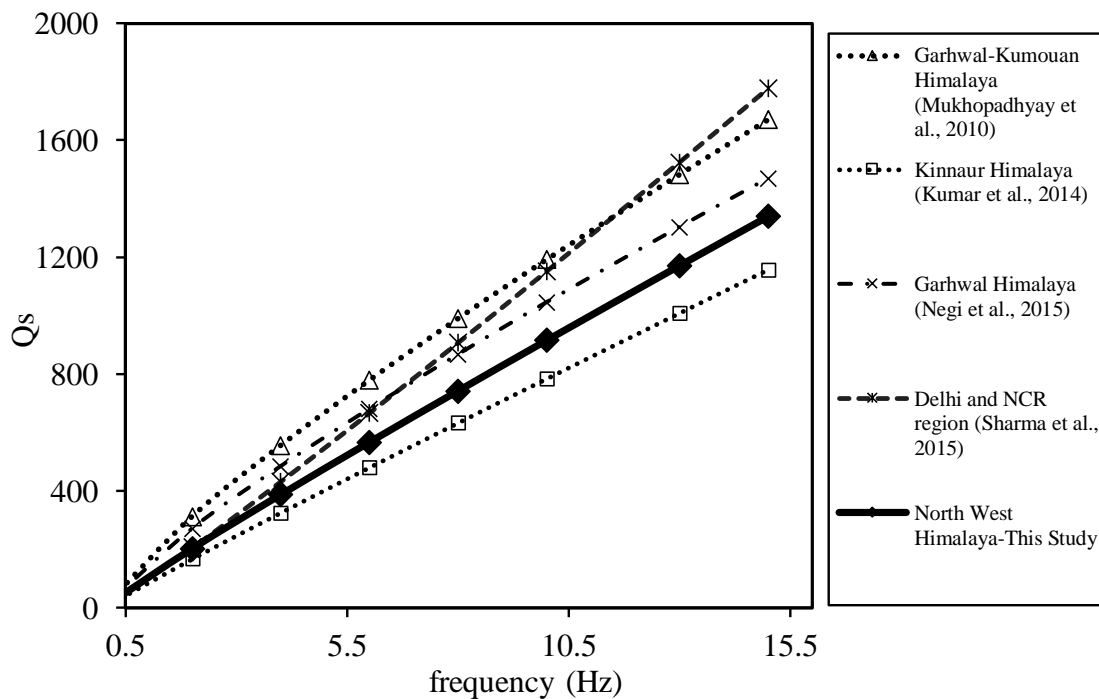

563

564

565

566

567

568

Figure 5: Comparison of  $Q_s$  values of North West Himalaya with those obtained from parts of North West Himalaya and Delhi region. The compared relations for  $Q_s$  versus frequency are as follows: Garhwal-Kumouan Himalaya:  $Q_s = 175 * f^{0.833}$  (Mukhopadhyay et al., 2010); Kinnaur Himalaya:  $Q_s = 86 * f^{0.96}$  (Kumar et al., 2014); Garhwal Himalaya:  $Q_s = 151 * f^{0.84}$  (Negi et al., 2015); Delhi and NCR region:  $Q_s = 98 * f^{1.07}$  (Sharma et al., 2015).

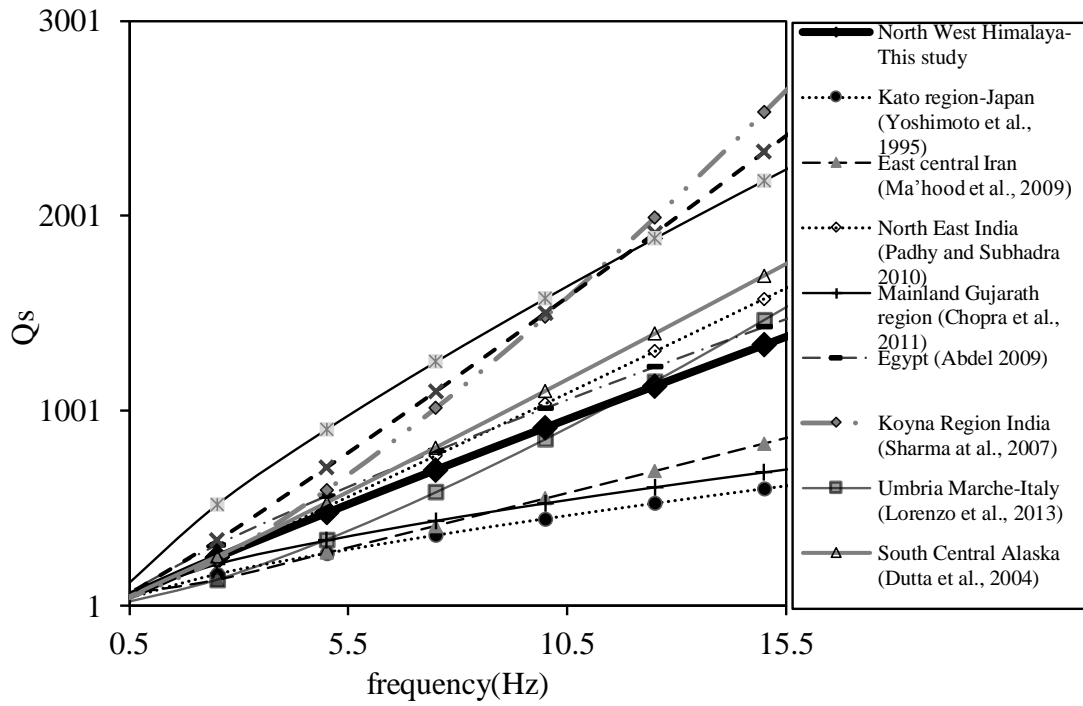

569  
570  
571

Figure 6: Comparison of  $Q_s$  values of this study with regions of different tectonic settings of the world.

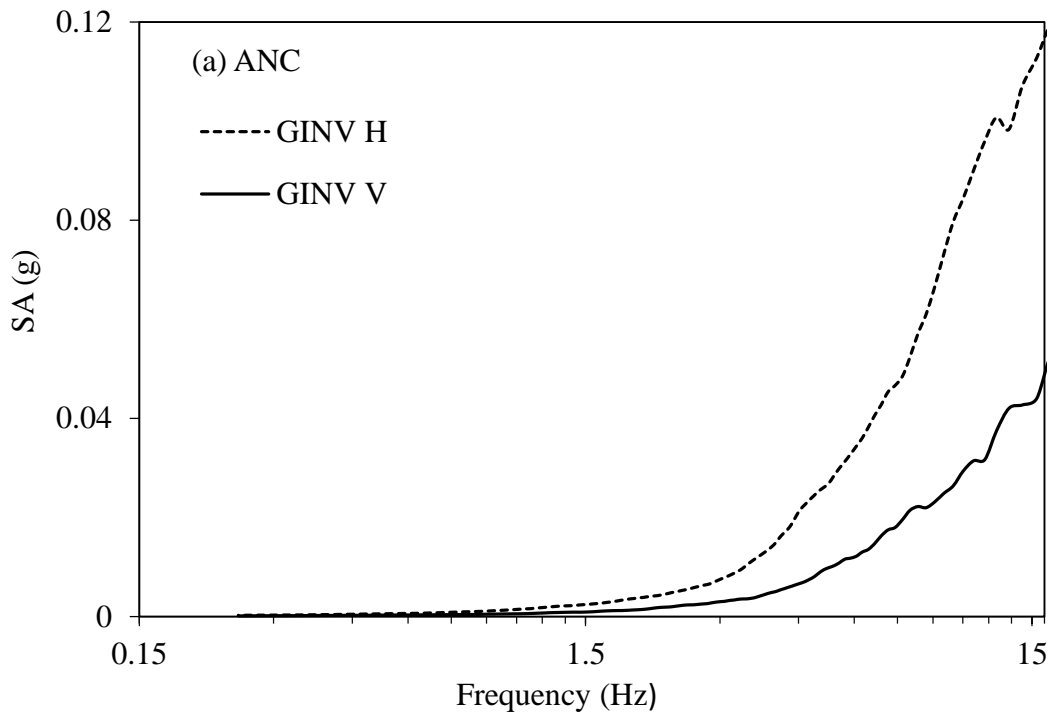

572

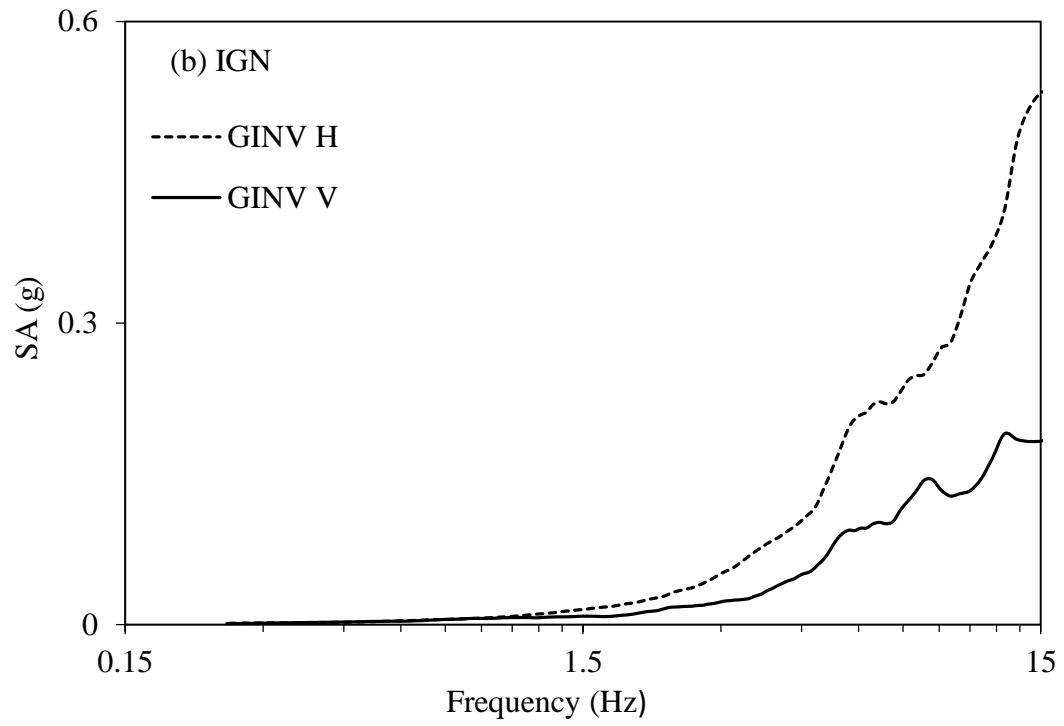

573

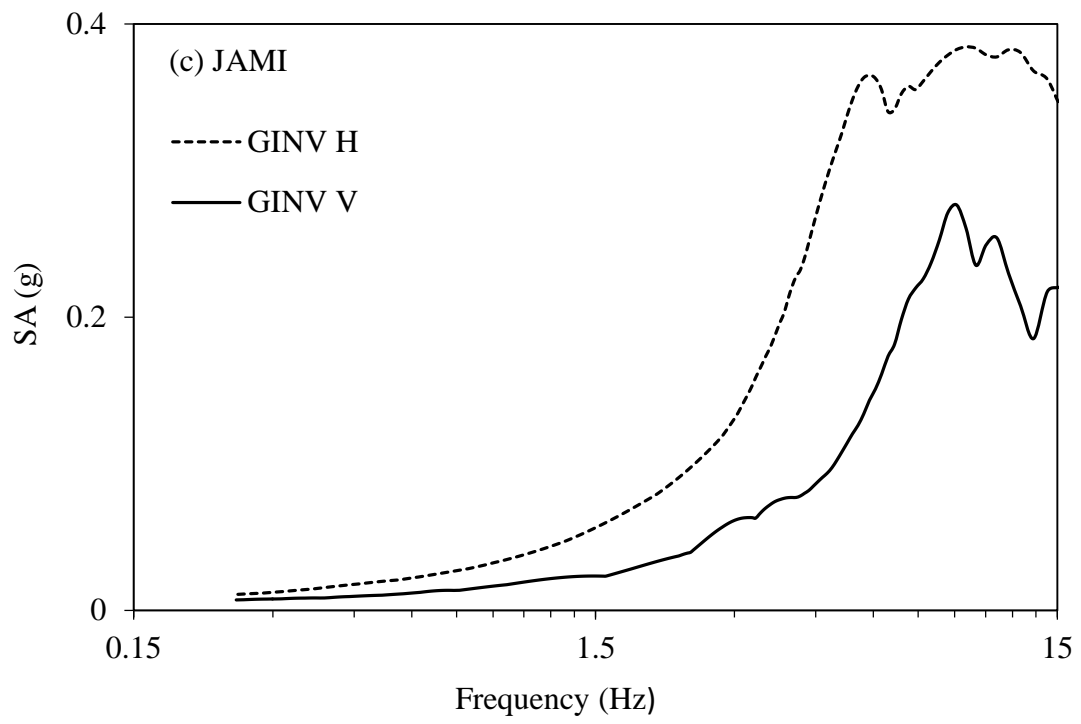

574

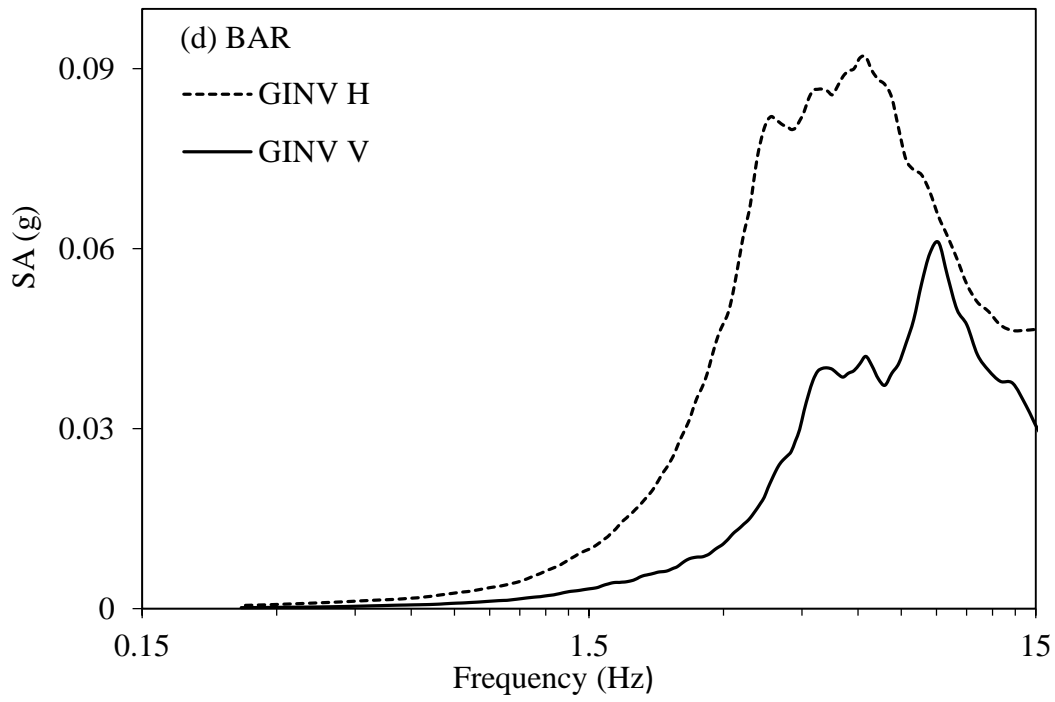

575

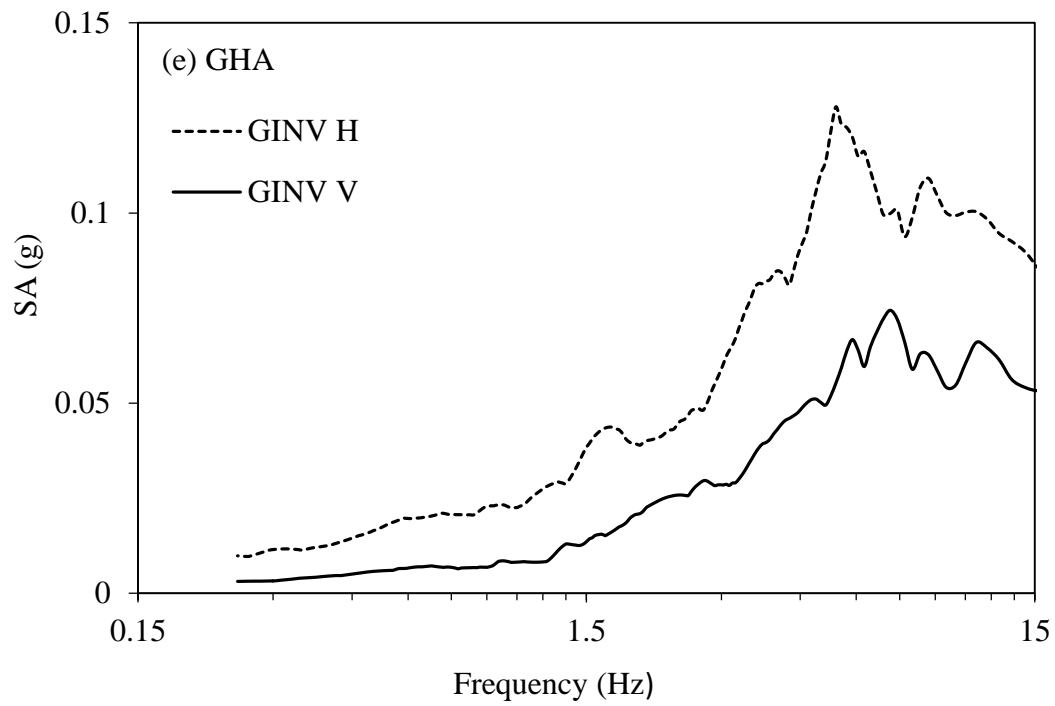

576

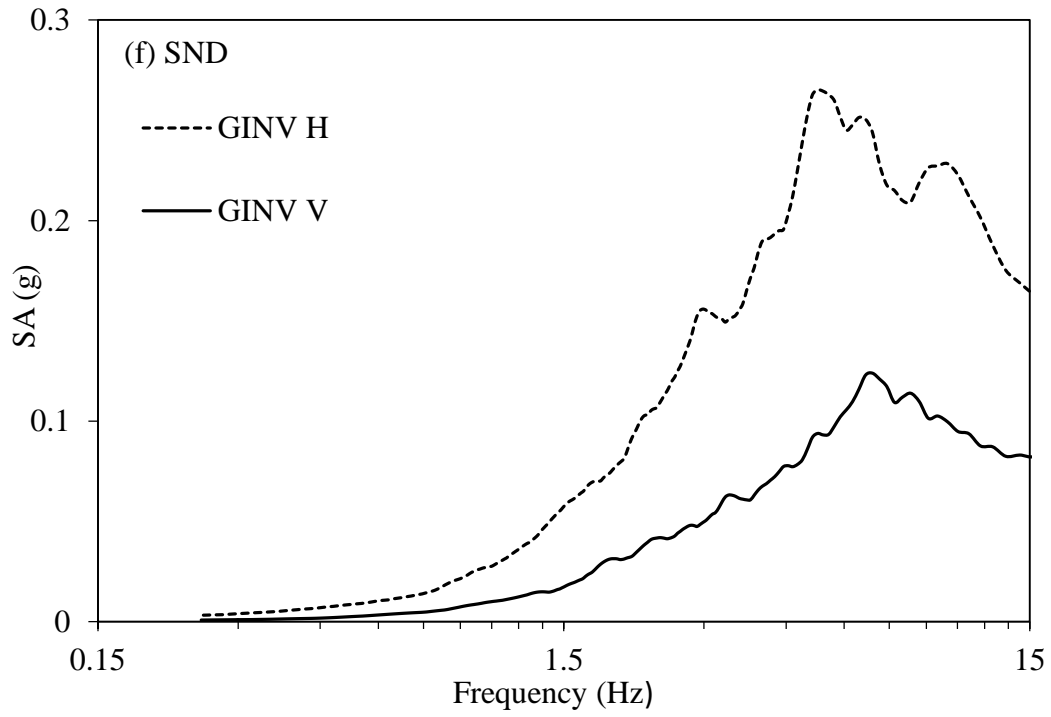

577  
578

579

Figure 7 (a-f). Site amplitude curves obtained using GINV for horizontal component and vertical component

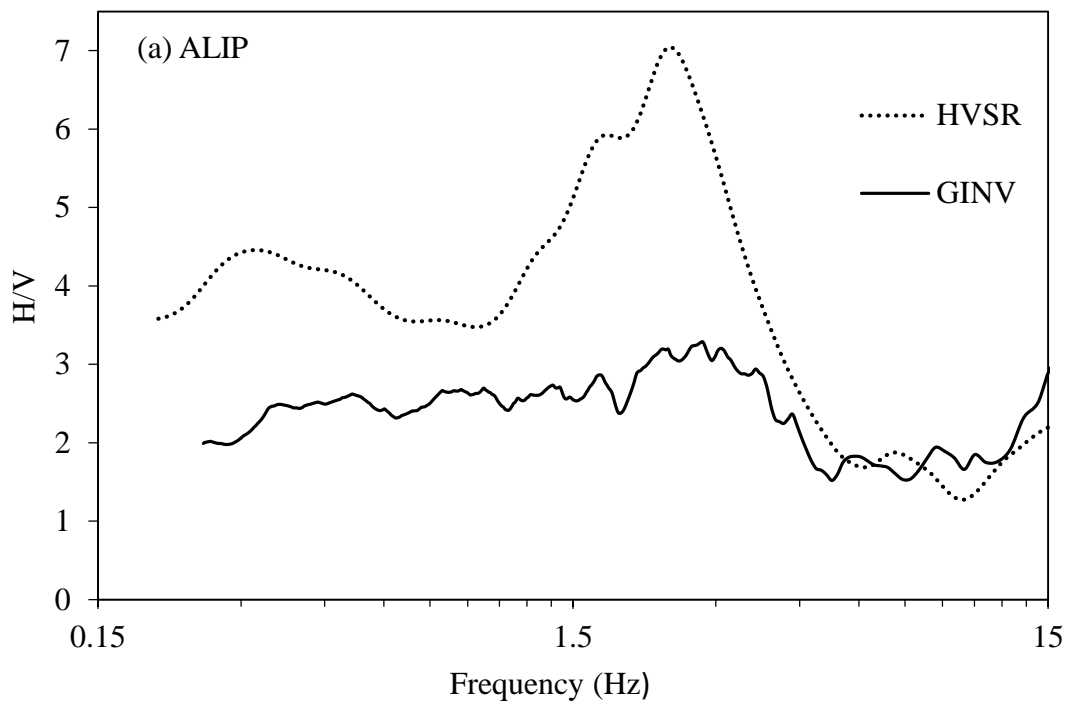

580



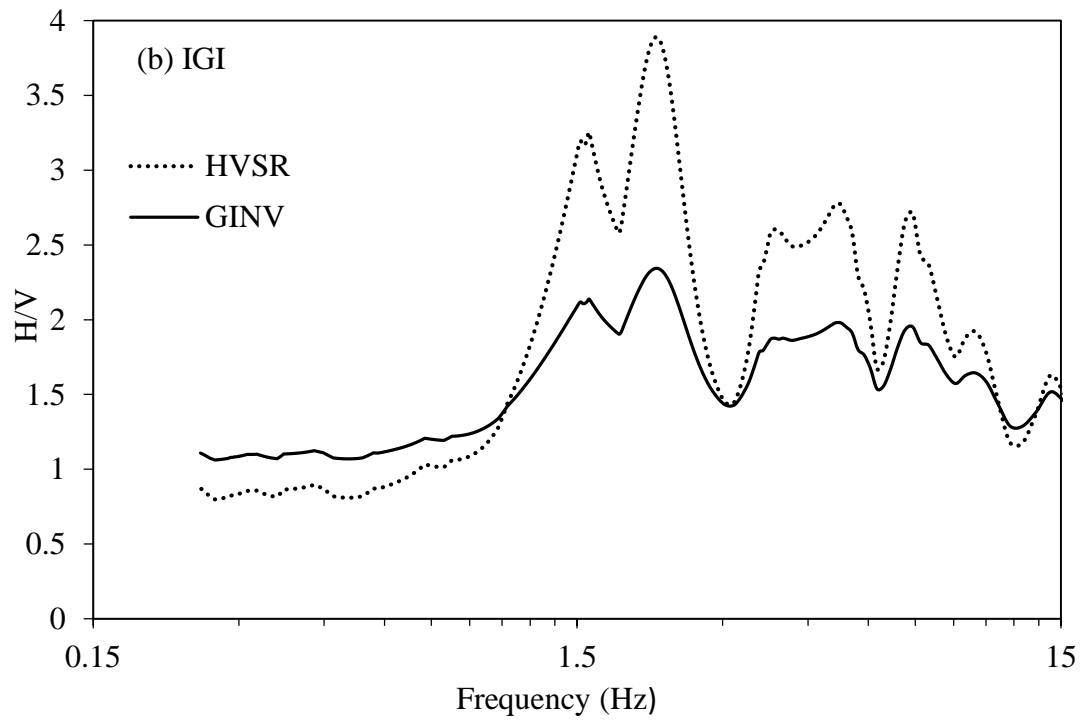

581

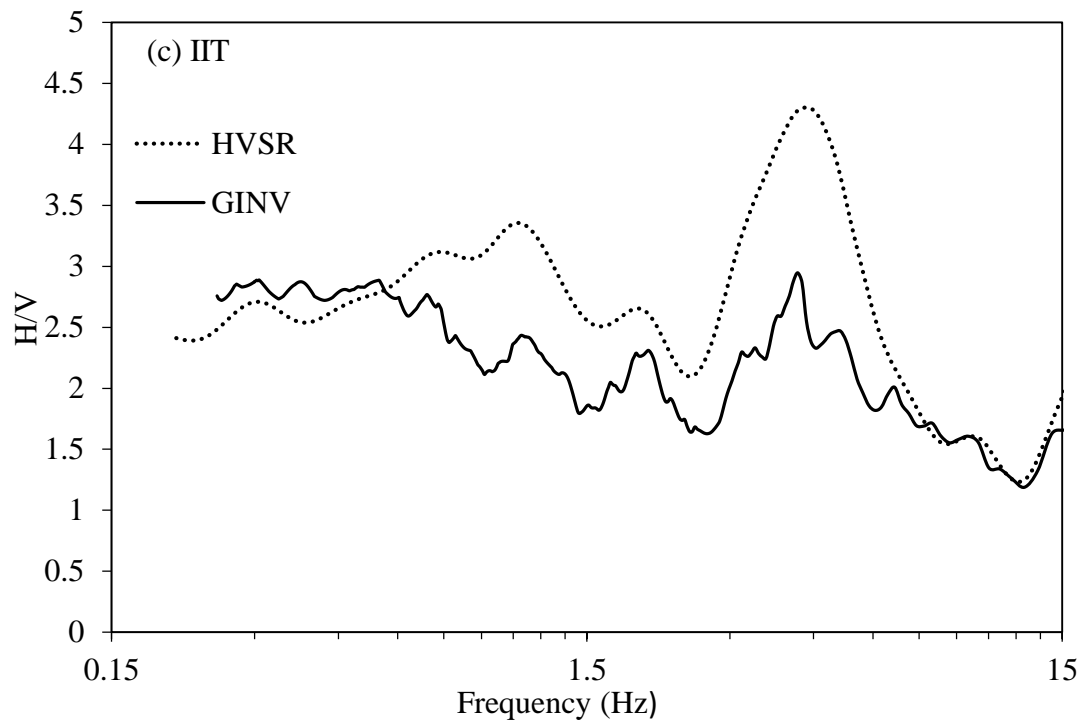

582

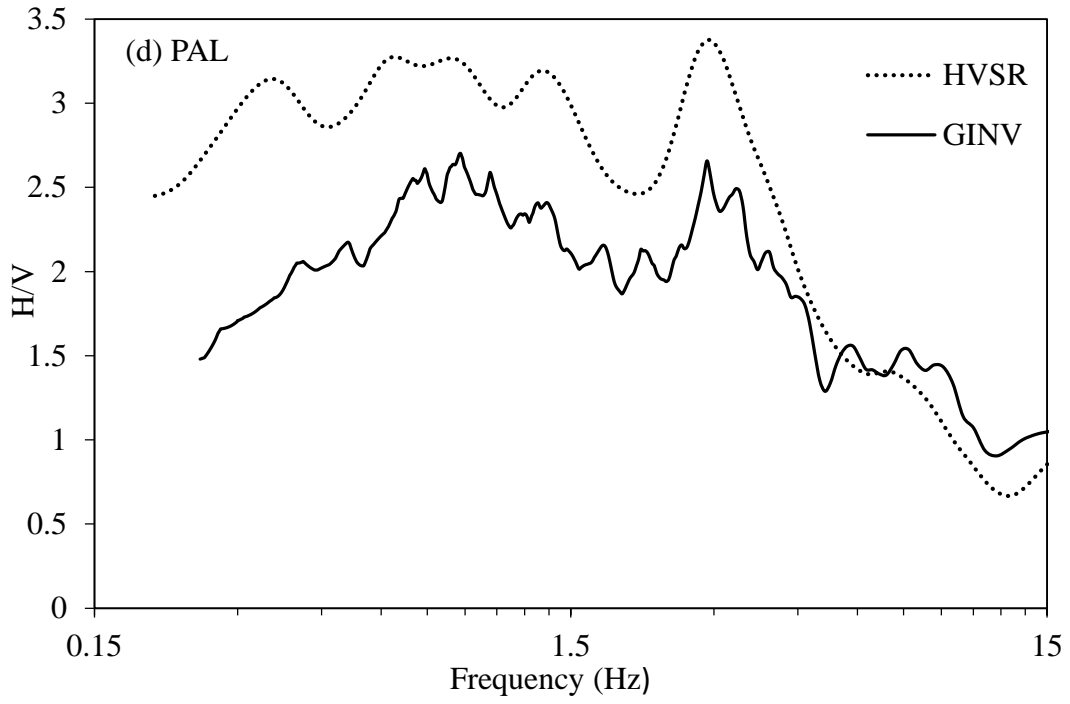

583

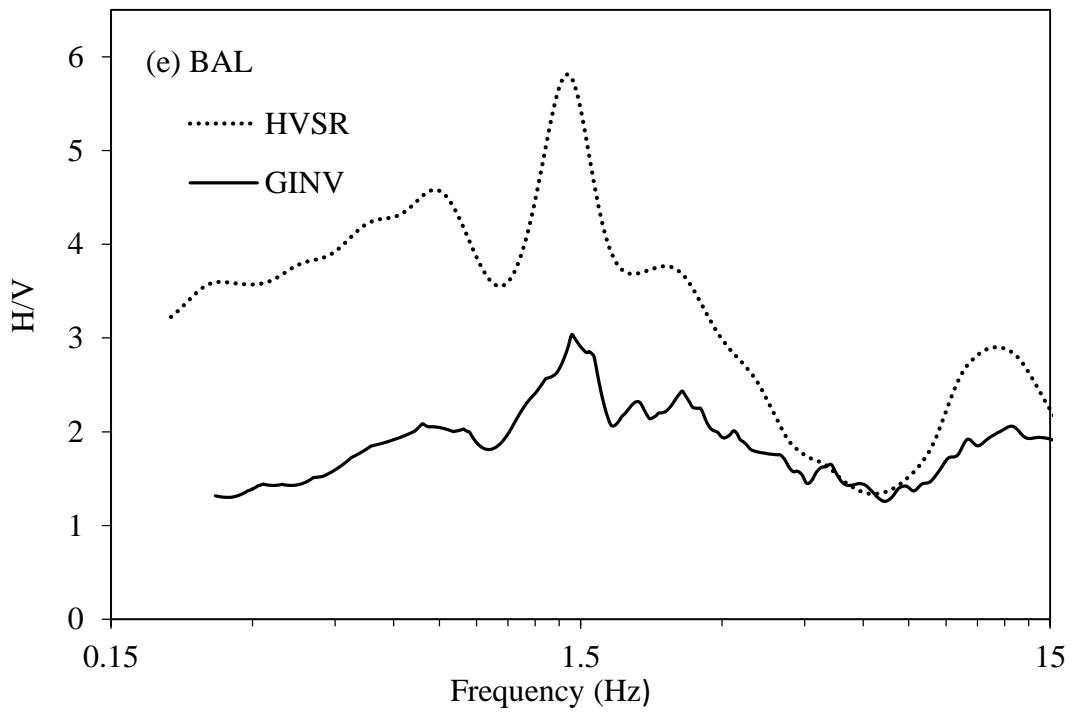

584

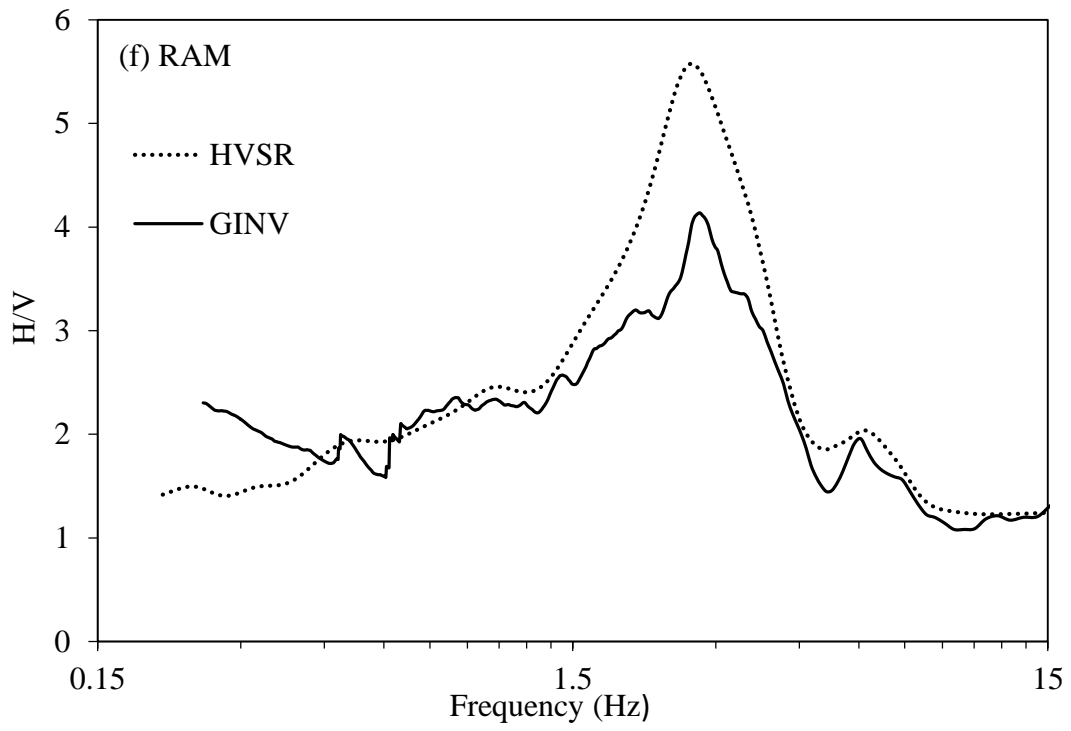

585

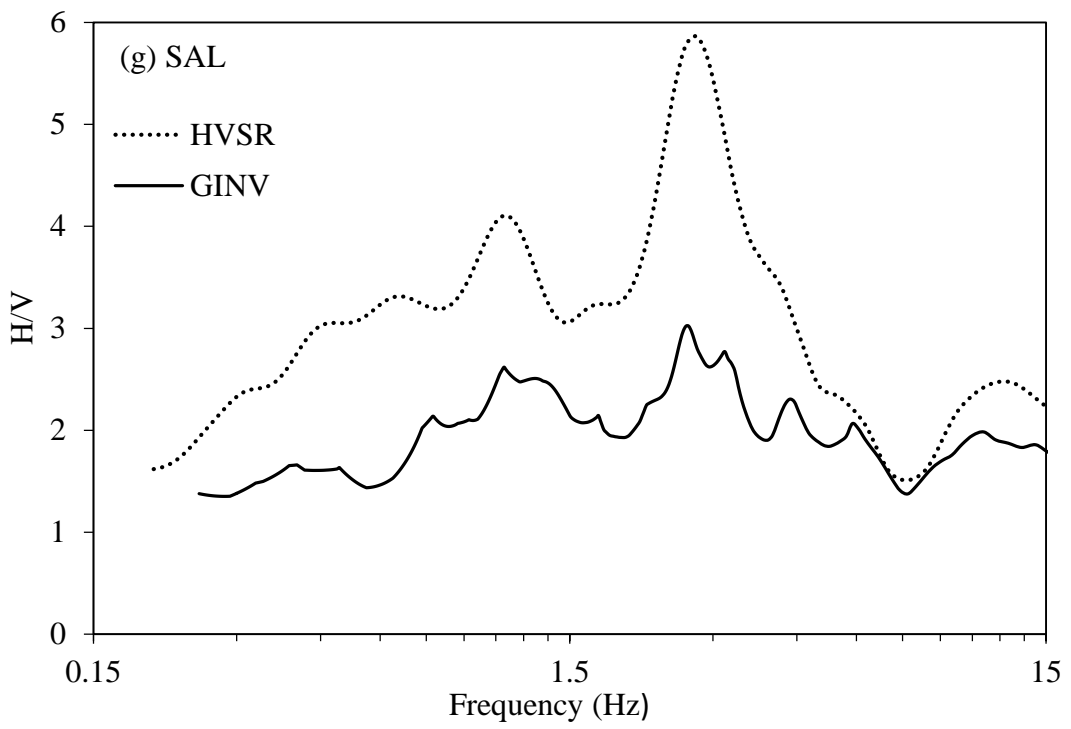

586

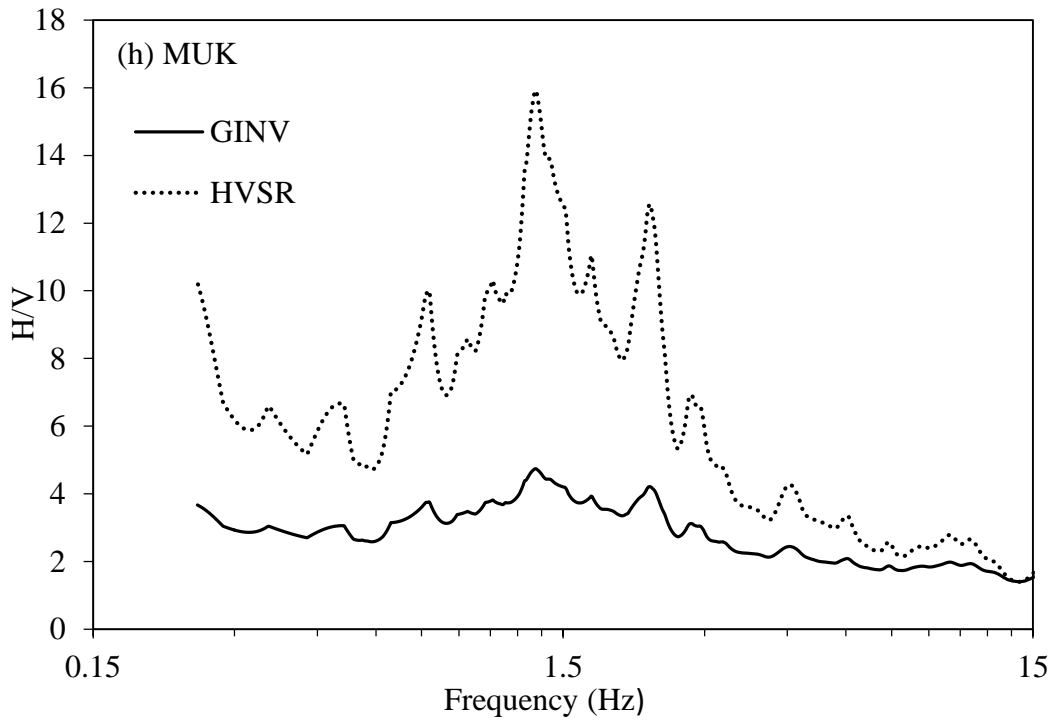

587

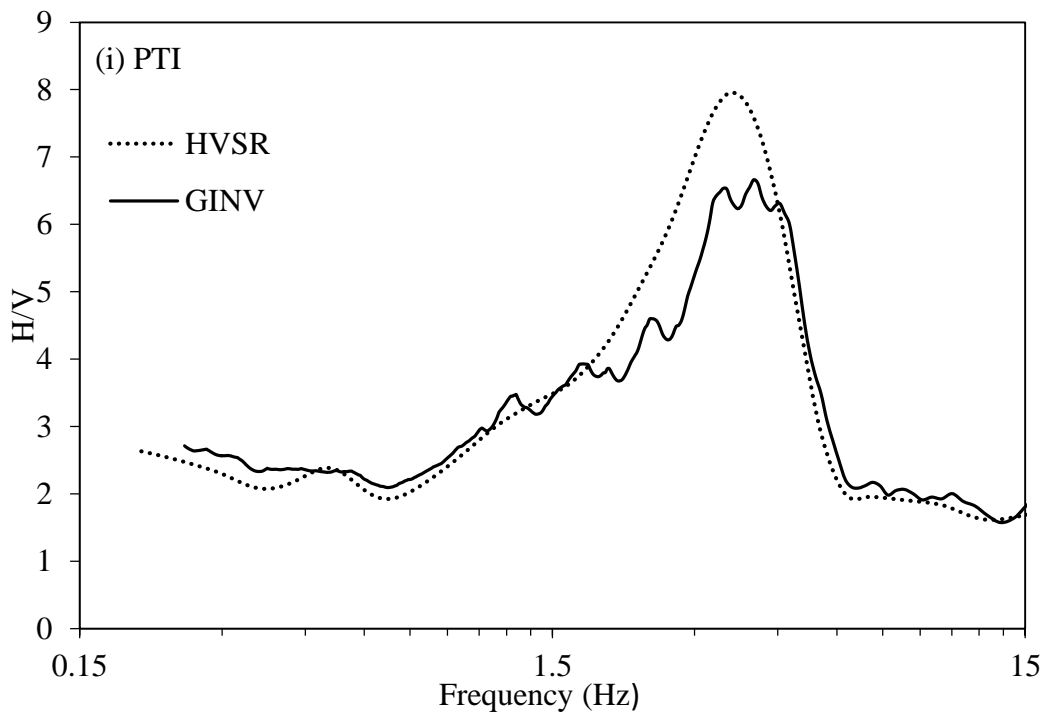

588

589

590

591

592

593

594

595

Figure 8 (a-i): Horizontal to vertical ratio curve obtained using GINV and HVSR method.

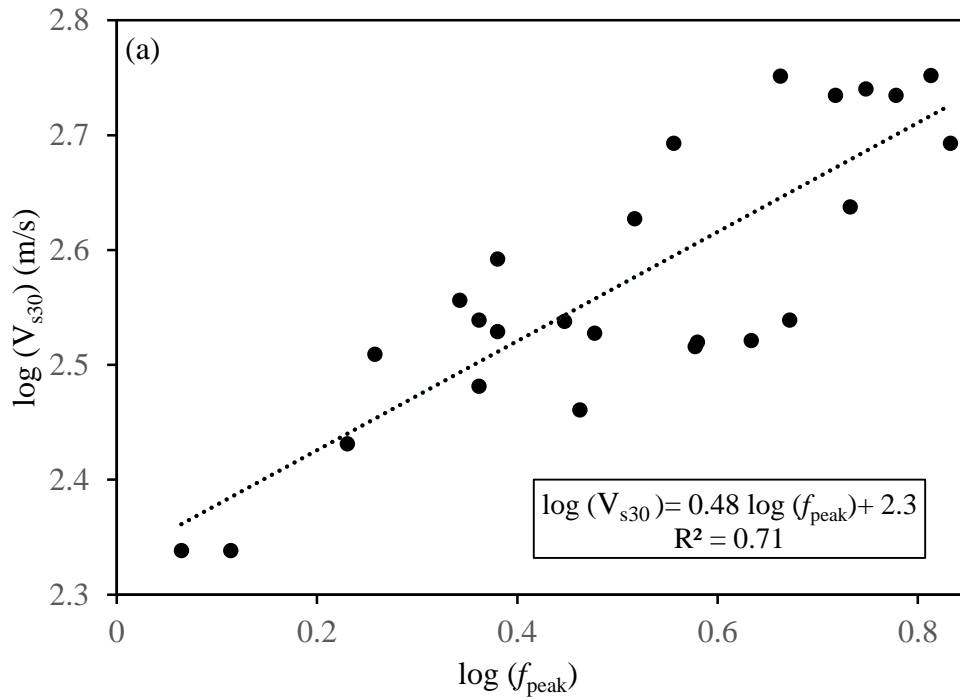

596

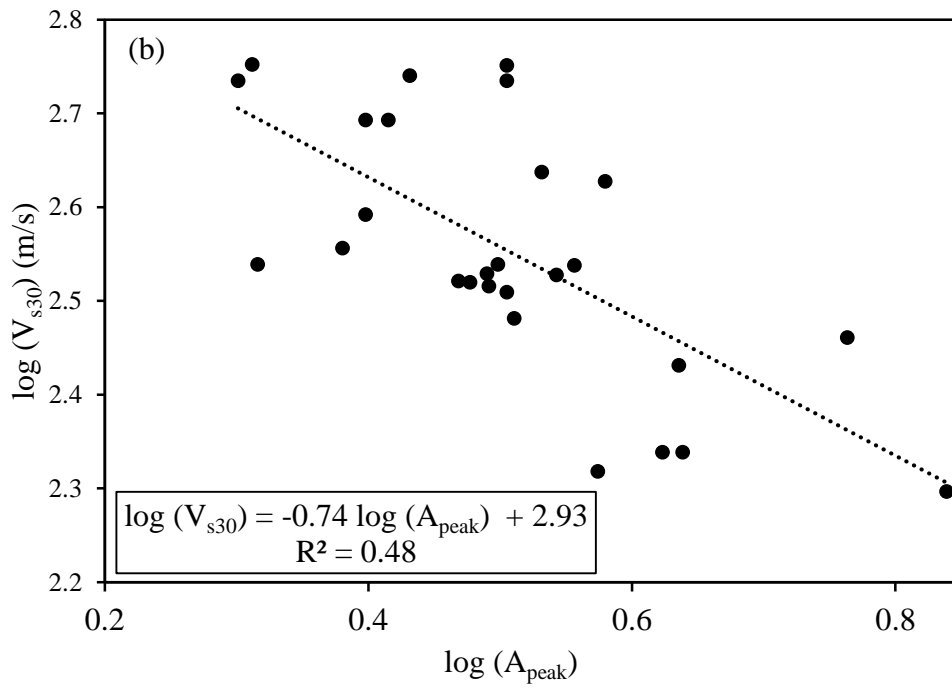

597

598

599

Figure 9:  $V_{s30}$  as a function of  $f_{\text{peak}}$  (a) and  $A_{\text{peak}}$  (b) of GINV method for recording stations at Delhi and Tarai region of Uttarakhand.

600

601

602

603

604

605

Table 1: Detail of strong motion recording stations.

| Si<br>no         | Statio<br>Code | Lat.(°<br>) (N) | Lon<br>(°)<br>(E) | GINV              |                   | HVSR              |                   | R<br>*<br>or<br>S# | Si<br>no    | Station<br>Code | Lat.(°<br>) (N) | Lon<br>(°)<br>(E) | GINV              |                   | HVSR              |                   | R<br>*<br>or<br>S# |
|------------------|----------------|-----------------|-------------------|-------------------|-------------------|-------------------|-------------------|--------------------|-------------|-----------------|-----------------|-------------------|-------------------|-------------------|-------------------|-------------------|--------------------|
|                  |                |                 |                   | f <sub>peak</sub> | A <sub>peak</sub> | f <sub>peak</sub> | A <sub>peak</sub> |                    |             |                 |                 |                   | f <sub>peak</sub> | A <sub>peak</sub> | f <sub>peak</sub> | A <sub>peak</sub> |                    |
| -1               | -2             | -3              | -4                | -5                | -6                | -7                | -8                | -9                 | -1          | -2              | -3              | -4                | -5                | -6                | -7                | -8                | -9                 |
| Himachal Pradesh |                |                 |                   |                   |                   |                   |                   |                    | Uttarakhand |                 |                 |                   |                   |                   |                   |                   |                    |
| 1                | AMB            | 31.7            | 76.1              | 1.7               | 4.3               | 1.2               | 9.3               | S                  | 1           | ALM             | 29.6            | 79.7              | 2.1               | 3.0               | 2.8               | 4.4               | S                  |
| 2                | BHA            | 31.6            | 77.9              | 4.5               | 4.0               | 4.1               | 4.4               | S                  | 2           | BAG             | 29.8            | 79.8              | 1.5               | 4.7               | 1.5               | 5.2               | S                  |
| 3                | CHM            | 30.4            | 79.3              | 1.4               | 5.4               | 1.5               | 7.5               | S                  | 3           | BAR             | 30.8            | 78.2              | 3.0               | 4.5               | 2.8               | 7.0               | S                  |
| 4                | DEH            | 31.9            | 76.2              | 6.8               | 3.5               | 10                | 5.4               | R                  | 4           | CHM             | 32.6            | 76.1              | 3.6               | 2.4               | 2.0               | 2.9               | S                  |
| 5                | DHH            | 32.2            | 76.3              | 2.7               | 4.5               | 2.7               | 4.9               | S                  | 5           | CHP             | 29.3            | 80.1              | 5.4               | 5.2               | 5.6               | 6.5               | S                  |
| 6                | HAM            | 31.7            | 76.5              | 2.9               | 3.3               | 3.1               | 6.6               | S                  | 6           | CKR<br>CMB      | 30.7            | 77.9              | 2.1               | 3.8               | 2.0               | 4.5               | S                  |
| 7                | JUB            | 31.1            | 77.7              | 5.8               | 3.3               | 5.6               | 4.9               | S                  | 7           | B               | 30.0            | 79.5              | 8.3               | 2.7               | 8.3               | 6.3               | R                  |
| 8                | KLG            | 32.6            | 77.0              | 8.0               | 1.8               | 8.3               | 2.2               | R                  | 8           | DHA             | 29.8            | 80.5              | 3.1               | 3.3               | 2.7               | 5.5               | S                  |
| 9                | KUL            | 32.0            | 77.1              | 3.3               | 2.3               | 3.1               | 3.0               | S                  | 9           | DNL             | 30.4            | 78.2              | 2.8               | 3.3               | 2.0               | 7.1               | S                  |
| 10               | MAN            | 31.7            | 76.9              | 2.5               | 3.4               | 2.3               | 5.3               | S                  | 10          | DUN             | 30.3            | 78.0              | 2.9               | 5.8               | 3.1               | 7.1               | S                  |
| 11               | RAM            | 31.4            | 77.6              | 2.8               | 4.2               | 2.7               | 5.6               | S                  | 11          | GAR             | 30.1            | 79.3              | 2.4               | 3.4               | 2.3               | 4.5               | S                  |
| 12               | SAL            | 32.7            | 76.1              | 2.7               | 3.0               | 2.7               | 5.8               | S                  | 12          | GHA             | 30.4            | 78.7              | 5.2               | 2.3               | 4.5               | 5.5               | S                  |
| 13               | SND            | 31.5            | 76.9              | 5.0               | 3.5               | 5.0               | 4.2               | S                  | 13          | GLTR            | 30.3            | 79.1              | 2.9               | 3.5               | 2.8               | 6.1               | S                  |
| 14               | SOL            | 30.9            | 77.1              | 0.5               | 2.6               | 0.6               | 4.6               | S                  | 14          | JSH             | 30.5            | 79.6              | 1.4               | 2.2               | 1.5               | 3.0               | S                  |
| 15               | UNA            | 31.5            | 76.3              | 1.5               | 3.9               | 1.8               | 6.0               | S                  | 15          | KAP             | 29.9            | 79.9              | 3.7               | 6.4               | 3.3               | 9.2               | S                  |
| 16               | KJK            | 30.9            | 76.9              | 0.7               | 6.4               | 0.4               | 12.0              | S                  | 16          | KHA             | 28.9            | 80.0              | 1.3               | 4.2               | 2.0               | 8.0               | S                  |
| 17               | PLM            | 32.1            | 76.5              | 1.7               | 1.8               | 1.6               | 2.2               | S                  | 17          | KKHR            | 30.2            | 78.9              | 9.5               | 3.5               | 9.5               | 9.3               | R                  |
| Punjab           |                |                 |                   |                   |                   |                   |                   |                    | 18          | KOT             | 29.7            | 78.5              | 0.7               | 2.4               | 0.7               | 3.3               | S                  |
| 1                | ANS            | 31.2            | 76.5              | 0.9               | 4.9               | 0.9               | 17.0              | S                  | 19          | KSK             | 29.2            | 79.0              | 3.1               | 3.8               | 3.2               | 9.9               | S                  |
| 2                | ASR            | 31.6            | 74.9              | 1.0               | 2.9               | 1.0               | 8.0               | S                  | 20          | KSL             | 30.9            | 77.0              | 3.0               | 3.9               | 2.1               | 19.4              | S                  |
| 3                | GSK            | 31.2            | 76.1              | 0.8               | 2.3               | 0.8               | 3.8               | S                  | 21          | LANG            | 30.3            | 79.3              | 7.7               | 2.8               | 7.9               | 5.7               | R                  |
| 4                | JAL            | 31.3            | 75.6              | 2.9               | 1.5               | 2.9               | 1.7               | S                  | 22          | LAN             | 29.8            | 78.7              | 1.4               | 2.8               | 1.4               | 6.1               | S                  |
| 5                | KAT            | 31.4            | 75.4              | 2.0               | 3.1               | 3.0               | 3.4               | S                  | 23          | MUN             | 30.1            | 80.2              | 4.3               | 2.8               | 7.0               | 3.6               | S                  |
| 6                | MOG            | 30.8            | 75.2              | 2.2               | 2.3               | 2.2               | 3.9               | S                  | 24          | PAU             | 30.2            | 78.8              | 5.9               | 2.1               | 3.1               | 3.7               | S                  |
| 7                | MUK            | 31.9            | 75.6              | 1.4               | 4.7               | 1.4               | 15.9              | S                  | 25          | PTH             | 29.6            | 80.2              | 8.0               | 2.7               | 4.6               | 3.1               | R                  |
| 8                | NAW            | 31.1            | 76.1              | 1.4               | 3.6               | 1.4               | 3.5               | S                  | 26          | PTI             | 29.4            | 79.9              | 4.0               | 6.6               | 3.6               | 8.0               | S                  |
| 9                | NKD            | 31.1            | 75.5              | 1.2               | 2.2               | 1.3               | 3.4               | S                  | 27          | RIS             | 30.1            | 78.3              | 3.8               | 3.0               | 3.4               | 6.4               | S                  |
| 10               | PHG            | 31.2            | 75.8              | 2.7               | 2.7               | 2.7               | 5.2               | S                  | 28          | ROO             | 29.9            | 77.9              | 1.2               | 4.4               | 1.3               | 5.2               | S                  |
| 11               | TAR            | 31.4            | 74.9              | 2.6               | 2.7               | 2.7               | 4.6               | S                  | 29          | RUD             | 30.3            | 79.0              | 1.3               | 2.8               | 1.5               | 4.2               | S                  |
| Delhi            |                |                 |                   |                   |                   |                   |                   |                    | 30          | SMLI            | 30.2            | 79.3              | 9.1               | 3.3               | 8.7               | 6.1               | R                  |
| 1                | ARI            | 26.1            | 77.5              | 2.7               | 3.2               | 2.5               | 7.0               | S                  | 31          | TAN             | 29.1            | 80.1              | 5.4               | 3.4               | 5.0               | 6.3               | S                  |
| 2                | IGN            | 28.5            | 77.2              | 3.6               | 2.6               | 4.5               | 3.9               | S                  | 32          | THE             | 30.4            | 78.4              | 1.6               | 2.8               | 1.5               | 3.6               | S                  |
| 3                | JNU            | 28.5            | 77.2              | 9.0               | 2.1               | 8.7               | 3.5               | R                  | 33          | UDH             | 29.0            | 79.4              | 2.7               | 6.9               | 2.2               | 10.1              | S                  |
| 4                | DJB            | 28.7            | 77.2              | 2.2               | 3.2               | 10                | 4.5               | S                  | 34          | UTK             | 30.7            | 78.4              | 2.4               | 2.9               | 2.3               | 4.4               | S                  |
| 5                | NDI            | 28.7            | 77.2              | 6.8               | 2.5               | 7.2               | 3.7               | R                  | 35          | VIK             | 30.5            | 77.8              | 2.3               | 3.8               | 2.3               | 10.4              | S                  |
| 6                | IMD            | 28.7            | 77.2              | 6.0               | 2.0               | 6.3               | 2.9               | S                  | 36          | GDRI            | 30.2            | 78.7              | 6.0               | 3.4               | 5.1               | 4.8               | S                  |
| 7                | NTPC           | 28.5            | 77.3              | 2.8               | 3.6               | 2.8               | 5.4               | S                  | 37          | TLWR            | 30.3            | 79.0              | 1.1               | 2.1               | 1.0               | 4.6               | S                  |
| 8                | ANC            | 28.5            | 77.3              | 4.6               | 3.2               | 4.5               | 4.5               | S                  | 38          | UKMB            | 30.3            | 79.1              | 1.0               | 2.9               | 1.4               | 10.0              | S                  |
| 9                | JAMI           | 28.6            | 77.3              | 4.7               | 3.2               | 4.5               | 7.3               | S                  | 39          | ADIB            | 30.2            | 79.2              | 6.4               | 12.7              | 6.3               | 17.8              | R                  |

|              |      |      |      |     |     |     |     |   |         |       |      |      |     |     |     |     |   |
|--------------|------|------|------|-----|-----|-----|-----|---|---------|-------|------|------|-----|-----|-----|-----|---|
| 10           | LDR  | 28.6 | 77.2 | 0.7 | 4.3 | 0.9 | 7.0 | S | 40      | NUTY  | 30.2 | 79.2 | 4.8 | 2.4 | 4.7 | 4.3 | S |
| 11           | VCD  | 28.6 | 77.2 | 4.6 | 2.7 | 4.6 | 3.6 | S | 41      | KHIB  | 30.2 | 78.8 | 7.7 | 3.3 | 8.0 | 8.7 | R |
| 12           | IIT  | 28.6 | 77.3 | 4.3 | 2.9 | 4.5 | 4.3 | S | 42      | STRK  | 30.3 | 79.0 | 4.7 | 2.8 | 4.7 | 5.8 | S |
| 13           | NSIT | 28.6 | 77.0 | 2.4 | 2.5 | 2.3 | 3.9 | S | 43      | NANP  | 30.3 | 79.3 | 3.9 | 3.5 | 3.8 | 9.1 | S |
| 14           | RGD  | 28.7 | 77.1 | 2.3 | 2.1 | 2.9 | 3.8 | S | Haryana |       |      |      |     |     |     |     |   |
| 15           | GGI  | 28.7 | 77.2 | 15  | 5.3 | 15  | 8.4 | R | 1       | PAL   | 28.1 | 77.3 | 2.8 | 2.7 | 2.9 | 3.4 | S |
| 16           | DLU  | 28.7 | 77.2 | 1.8 | 3.2 | 1.9 | 3.7 | S | 2       | JAFR  | 28.6 | 76.9 | 6.0 | 2.0 | 7.1 | 2.6 | S |
| 17           | DCE  | 28.8 | 77.1 | 3.8 | 3.1 | 4.7 | 4.2 | S | 3       | GUR   | 28.4 | 77.0 | 1.0 | 4.1 | 1.0 | 5.2 | S |
| 18           | IGI  | 28.6 | 77.1 | 2.2 | 2.4 | 2.2 | 3.8 | S | 4       | REW   | 28.2 | 76.6 | 2.5 | 2.1 | 2.5 | 3.7 | S |
| 19           | ZAKI | 28.6 | 77.2 | 3.9 | 3.5 | 3.9 | 8.4 | S | 5       | SON   | 29.0 | 77.0 | 1.0 | 3.5 | 2.8 | 4.0 | S |
| 20           | ALIP | 28.8 | 77.1 | 2.3 | 3.2 | 2.5 | 6.9 | S | 6       | ROH   | 28.6 | 77.2 | 1.4 | 3.1 | 2.0 | 4.6 | S |
| 21           | ROI  | 28.6 | 77.2 | 1.4 | 3.1 | 2.0 | 4.6 | S | 7       | CRRRI | 29.0 | 77.1 | 4.3 | 3.5 | 4.4 | 9.3 | S |
| R* Rock site |      |      |      |     |     |     |     |   | 8       | BAL   | 28.3 | 77.3 | 1.5 | 3.0 | 1.4 | 5.8 | S |
| S# Soil site |      |      |      |     |     |     |     |   | 9       | KAI   | 29.8 | 76.4 | 1.2 | 3.0 | 1.2 | 6.5 | S |

608

609  
610

**Table 2: Details of earthquake events (from PESMOS) considered for estimation of site parameters in this work.**

| Event No. | dd/mm/yy   | Lat . | Lon g. | Depth h | Magnitude | Event No. | dd/mm/yy   | Lat . | Lon g. | Depth h | Magnitude |
|-----------|------------|-------|--------|---------|-----------|-----------|------------|-------|--------|---------|-----------|
| -1        | -6         | -2    | -3     | -4      | -5        | -1        | -6         | -2    | -3     | -4      | -5        |
| 1         | 14-12-2005 | 30.9  | 79.3   | 25.7    | 5.2       | 44        | 24-09-2011 | 30.9  | 78.3   | 10.0    | 3.0       |
| 2         | 07-05-2006 | 28.7  | 76.6   | 20.2    | 4.1       | 45        | 26-10-2011 | 31.5  | 76.8   | 5.0     | 3.5       |
| 3         | 29-11-2006 | 27.6  | 76.7   | 13.0    | 3.9       | 46        | 16-01-2012 | 29.7  | 78.9   | 10.0    | 3.6       |
| 4         | 10-12-2006 | 31.5  | 76.7   | 33.0    | 3.5       | 47        | 12-03-2012 | 28.9  | 77.3   | 5.0     | 3.5       |
| 5         | 22-07-2007 | 29.9  | 77.9   | 33.0    | 5.0       | 48        | 26-02-2012 | 29.6  | 80.8   | 10.0    | 4.3       |
| 6         | 25-11-2007 | 28.6  | 77.0   | 20.3    | 4.3       | 49        | 27-03-2012 | 26.1  | 87.8   | 12.0    | 3.5       |
| 7         | 04-10-2007 | 32.5  | 76.0   | 10.0    | 3.8       | 50        | 05-03-2012 | 28.7  | 76.6   | 14.0    | 4.9       |
| 8         | 18-10-2007 | 28.3  | 77.6   | 5.6     | 3.6       | 51        | 28-07-2012 | 29.7  | 80.7   | 10.0    | 4.5       |
| 9         | 19-08-2008 | 30.1  | 80.1   | 15.0    | 4.3       | 52        | 23-08-2012 | 28.4  | 82.7   | 5.0     | 5.0       |
| 10        | 19-10-2008 | 29.1  | 76.9   | 7.0     | 3.2       | 53        | 02-10-2012 | 32.4  | 76.4   | 10.0    | 4.9       |
| 11        | 21-10-2008 | 31.5  | 77.3   | 10.0    | 4.5       | 54        | 03-10-2012 | 32.4  | 76.3   | 10.0    | 3.6       |
| 12        | 31-01-2009 | 32.5  | 75.9   | 10.0    | 3.7       | 55        | 06-11-2012 | 32.3  | 76.2   | 5.0     | 4.1       |
| 13        | 09-01-2009 | 31.7  | 78.3   | 16.0    | 3.8       | 56        | 11-11-2012 | 29.3  | 80.1   | 5.0     | 5.0       |
| 14        | 25-02-2009 | 30.6  | 79.3   | 10.0    | 3.7       | 57        | 15-11-2012 | 30.2  | 80.1   | 5.0     | 3.0       |
| 15        | 18-03-2009 | 30.9  | 78.2   | 10.0    | 3.3       | 58        | 27-11-2012 | 30.9  | 78.4   | 12.0    | 4.8       |
| 16        | 04-09-2008 | 30.1  | 80.4   | 10.0    | 5.1       | 59        | 19-12-2012 | 28.6  | 76.8   | 10.0    | 2.9       |
| 17        | 01-05-2009 | 29.8  | 80.1   | 10.0    | 4.6       | 60        | 02-01-2012 | 29.8  | 81.1   | 10.0    | 4.8       |

|    |            |      |      |      |     |    |            |      |      |      |      |  |
|----|------------|------|------|------|-----|----|------------|------|------|------|------|--|
|    | 2009       | 9    |      |      |     |    | 2013       | 4    |      |      |      |  |
| 18 | 15-05-2009 | 30.5 | 79.3 | 15.0 | 4.1 | 61 | 09-01-2013 | 29.8 | 81.7 | 5.0  | 5.0  |  |
| 19 | 17-07-2009 | 32.3 | 76.1 | 39.3 | 3.7 | 62 | 10-01-2013 | 30.1 | 80.4 | 5.0  | 3.2  |  |
| 20 | 27-08-2009 | 30.0 | 80.0 | 14.0 | 3.9 | 63 | 29-01-2013 | 30.0 | 81.6 | 7.0  | 4.0  |  |
| 21 | 21-09-2009 | 30.9 | 79.1 | 13.0 | 4.7 | 64 | 11-02-2013 | 31.0 | 78.4 | 5.0  | 4.3  |  |
| 22 | 03-10-2009 | 30.0 | 79.9 | 15.0 | 4.3 | 65 | 17-02-2013 | 30.9 | 78.4 | 10.0 | 3.2  |  |
| 23 | 06-12-2009 | 35.8 | 77.3 | 60.0 | 5.3 | 66 | 01-05-2013 | 33.1 | 75.8 | 15.0 | 5.8  |  |
| 24 | 11-01-2010 | 29.7 | 80.0 | 15.0 | 3.9 | 67 | 05-09-2013 | 30.9 | 78.5 | 11.0 | 3.5  |  |
| 25 | 22-02-2010 | 30.0 | 80.1 | 2.0  | 4.7 | 68 | 11-11-2013 | 28.5 | 77.2 | 10.0 | 3.1  |  |
| 26 | 24-02-2010 | 28.6 | 76.9 | 17.0 | 2.5 | 69 | 11-11-2013 | 28.4 | 77.2 | 11.0 | 2.8  |  |
| 27 | 14-03-2010 | 31.7 | 76.1 | 29.0 | 4.6 | 70 | 11-11-2013 | 28.4 | 77.2 | 12.0 | 2.5  |  |
| 28 | 03-05-2010 | 30.4 | 78.4 | 8.0  | 3.5 | 71 | 11-11-2013 | 28.4 | 77.2 | 13.0 | 3.1  |  |
| 29 | 28-05-2010 | 31.2 | 77.9 | 43.0 | 4.8 | 72 | 16-04-2013 | 28.0 | 62.1 | 16.0 | 7.8  |  |
| 30 | 31-05-2010 | 30.0 | 79.8 | 10.0 | 3.6 | 73 | 04-06-2013 | 32.7 | 76.7 | 18.0 | 4.8  |  |
| 31 | 06-07-2010 | 29.8 | 80.4 | 10.0 | 5.1 | 74 | 05-06-2013 | 32.8 | 76.3 | 10.0 | 4.5  |  |
| 32 | 10-07-2010 | 29.9 | 79.6 | 10.0 | 4.1 | 75 | 09-07-2013 | 32.9 | 78.4 | 10.0 | 5.1  |  |
| 33 | 26-01-2011 | 29.0 | 77.2 | 10.0 | 3.2 | 76 | 13-07-2013 | 32.2 | 76.3 | 10.0 | 10.0 |  |
| 34 | 14-03-2011 | 30.5 | 79.1 | 8.0  | 3.3 | 77 | 15-07-2013 | 32.6 | 76.7 | 30.0 | 4.4  |  |
| 35 | 18-02-2011 | 28.6 | 77.3 | 5.0  | 2.3 | 78 | 02-08-2013 | 33.5 | 75.5 | 20.0 | 5.4  |  |
| 36 | 09-02-2011 | 30.9 | 78.2 | 10.0 | 5.0 | 79 | 29-08-2013 | 31.4 | 76.1 | 10.0 | 4.7  |  |
| 37 | 04-04-2011 | 29.6 | 80.8 | 10.0 | 5.7 | 80 | 20-10-2013 | 35.8 | 77.5 | 80.0 | 5.5  |  |
| 38 | 15-06-2011 | 30.6 | 80.1 | 10.0 | 3.6 | 81 | 25-12-2013 | 31.2 | 78.3 | 10.0 | 4.0  |  |
| 39 | 20-06-2011 | 30.5 | 79.4 | 12.0 | 4.6 | 82 | 17-06-2014 | 32.2 | 76.1 | 10.0 | 4.1  |  |
| 40 | 23-06-2011 | 30.0 | 80.5 | 5.0  | 3.2 | 83 | 21-08-2014 | 32.3 | 76.5 | 10.0 | 5.0  |  |
| 41 | 28-07-2011 | 33.3 | 76.0 | 21.0 | 4.4 | 84 | 29-11-2015 | 30.6 | 79.6 | 15.0 | 4.0  |  |
| 42 | 07-09-2011 | 28.6 | 77.0 | 8.0  | 4.2 | 85 | 25-09-2016 | 30.0 | 79.5 | 11.0 | 3.7  |  |
| 43 | 21-09-2011 | 30.9 | 78.3 | 10.0 | 3.1 | 86 | 01-12-2016 | 30.6 | 79.6 | 19.0 | 4.0  |  |

611

612 **Table 3: List of Earthquakes and the corresponding stations considered for the estimation of path**  
613 **parameter.**

| Earthquake Event | Stations |
|------------------|----------|
|------------------|----------|



|                       |                                                                                                                        |
|-----------------------|------------------------------------------------------------------------------------------------------------------------|
| 25-11- 2007           | HGR, NDI, CRRI, PAL, REW, NDI , CRRI, LDR, JAFR, IIT                                                                   |
| 19-08-2008            | CHP, PTH, KAP, MUN                                                                                                     |
| 04-09- 2008           | MUN, CHP, PTH, DHA , KAP, GHA, JSH                                                                                     |
| 01-05-2009            | MUN, BAG, KAP, GAR, CHM                                                                                                |
| 17-07-2009            | DHA, KLG                                                                                                               |
| 27-08-2009            | KAP, BAG, MUN                                                                                                          |
| 03-08-2009            | KAP, CHP, BAG                                                                                                          |
| 11-01-2010            | PTH, CHP, DHA                                                                                                          |
| 22-02-2010            | KAP, BAG, DHA, ROO, UDH                                                                                                |
| 24-02-2010            | RGD, IGN, ROH, DJB, CHP, ANC, JAMI, GGI, DLU, DCE                                                                      |
| 14-03-2010            | DEH, JUB, SND, BHA, HAM, GAR, JAL, KAP, AMB, ROO                                                                       |
| 03-04-2010            | THE, BAR, DNL, ROO                                                                                                     |
| 28-05-2010            | JUB, BAR, ROO, UNA                                                                                                     |
| 06-06-2010            | MUN, CHP                                                                                                               |
| 10-07-2010            | BAG, KAP, GAR, ROO                                                                                                     |
| 18-02-2011            | DJB, ANC                                                                                                               |
| 09-02-2011            | UTK, SND, KUL, CKR                                                                                                     |
| 04-04-2011            | JSH, CHP, PTI, PTH, ALM, DDH, BAG, DHA, GAR, MUN, RUD, THE, CHM, BAR, SND, KOT, DNL, LDR, ROO, TAN, KHA, UDH, KSH, DUD |
| 12-03-2012            | GGI, ANC, DLU, DCE                                                                                                     |
| 27-03-2012            | ARI, ANC                                                                                                               |
| 05-03-2012            | JAFR, JNU, DJB, IMD, PLW, GUR, NOI, NTPC, ANC, IIT, NSIT, ZAKI, ROO, RGD, GGI, DLU, DCE, ALIP, SON, BAR, KAI, NKD,     |
| 02-10-2012            | CHA, RAM                                                                                                               |
| 11-11-2012            | CHA, CHP, PTH                                                                                                          |
| 27-11-2012            | UTK, THE, DNL, CKR                                                                                                     |
| 02-01-2013            | CHP, PTI, PTH                                                                                                          |
| 09-01-2013            | CHP, PTI, PTH, TAN                                                                                                     |
| 11-02-2013            | UTK, ROO                                                                                                               |
| 11-11-2013 (19:11:18) | NTPC, IGN, JNU, DJB, IMD, VCD, IGI, RGD, GGI, DLU, DCE, ALIP                                                           |
| 11-11-2013 (22,10,42) | IGN, JNU, DJB, VCD, RGD, DCE, ALIP                                                                                     |
| 11-11-2013 (20:11:30) | IGN, JNU, DJB, VCD, RGD, GGI, DLU, DCE                                                                                 |
| 29-08- 2013           | GSK, RAM, ROO, NKD, ANS, KAT                                                                                           |
| 25-09-2016            | UKMB, CMBB, GDRI, DURD                                                                                                 |

614

615

**Table 4: Resulting parameters of eq. 7.**

|        |        | $Q_0 = \frac{(\pi f)}{(\beta m)}$ |
|--------|--------|-----------------------------------|
| f (Hz) | m      |                                   |
| (1)    | (2)    | (3)                               |
| 0.50   | 0.0095 | 51.65                             |
| 1.00   | 0.0101 | 97.15                             |
| 1.75   | 0.0115 | 149.32                            |
| 2.50   | 0.0096 | 255.53                            |
| 3.12   | 0.0089 | 344.54                            |
| 3.57   | 0.0093 | 376.67                            |
| 4.50   | 0.0098 | 450.57                            |
| 5.00   | 0.0074 | 663.01                            |
| 5.50   | 0.0089 | 606.39                            |
| 6.25   | 0.0084 | 730.09                            |
| 7.14   | 0.011  | 636.92                            |
| 8.00   | 0.013  | 603.84                            |
| 10.00  | 0.0172 | 570.49                            |
| 11.76  | 0.0124 | 930.60                            |

|       |        |         |
|-------|--------|---------|
| 12.50 | 0.0102 | 1202.51 |
| 13.33 | 0.0098 | 1334.70 |
| 14.28 | 0.0115 | 1218.46 |
| 15.00 | 0.0108 | 1362.85 |

616  
617

**Table 5:  $f_{peak}$ ,  $A_{peak}$  and  $V_{s30}$  values for 27 stations located in Terai region of Uttarakhand and Delhi region.**

| Station Code | GINV            |            |                 |
|--------------|-----------------|------------|-----------------|
|              | $f_{peak}$ (Hz) | $A_{peak}$ | $V_{s30}$ (m/s) |
| IGN          | 3.6             | 2.6        | 493*            |
| JNU          | 6.5             | 2.05       | 565*            |
| DJB          | 5.22            | 3.2        | 543*            |
| NDI          | 6.8             | 2.5        | 493*            |
| IMD          | 6               | 2          | 543*            |
| NTPC         | 2.8             | 3.6        | 345*            |
| ANC          | 4.6             | 3.2        | 564*            |
| JAMI         | 4.7             | 3.15       | 346*            |
| LDR          | 0.7             | 4.32       | 270*            |
| VCD          | 5.6             | 2.7        | 550*            |
| IIT          | 4.3             | 2.94       | 332*            |
| NSIT         | 2.4             | 2.5        | 391*            |
| RGD          | 2.3             | 2.07       | 346*            |
| DLU          | 1.81            | 3.2        | 323*            |
| DCE          | 3.78            | 3.1        | 328*            |
| IGI          | 2.2             | 2.4        | 360*            |
| ZAKI         | 3               | 3.49       | 337*            |
| ROI          | 2.3             | 3.24       | 303*            |
| ALIP         | 1.4             | 3.09       | 338*            |
| DUN          | 2.9             | 5.8        | 289**           |
| KHA          | 1.3             | 4.2        | 218**           |
| KSK          | 3.13            | 3.75       | 208**           |
| RIS          | 3.8             | 3          | 331**           |
| ROO          | 1.16            | 4.35       | 218**           |
| TAN          | 5.4             | 3.4        | 434**           |
| UDH          | 2.74            | 6.9        | 198**           |
| VIK          | 2.29            | 3.8        | 424**           |

\*\*Pandey et al., 2016a; \* Pandey et al., 2016b

618  
619  
620  
621  
622  
623  
624  
625

626  
627  
628  
629  
630  
631  
632  
633  
634  
635  
636  
637  
638  
639  
640  
641  
642  
643  
644  
645  
646  
647  
648  
649  
650  
651

**List of Figures**

1. Figure 1: Map of the region under study with EQs (stars), recording stations (triangles), and paths (solid-lines).
2. Figure 2: Distribution of hypocentral distances in the data set.
3. Figure 3: S wave spectral attenuation versus hypocentral distance. Note that  $\text{Log } A(f, R_0)$  at reference distance is zero.
4. Figure 4: Frequency dependence of the quality factor  $Q$  for hypocentral distances between 15km to 105km
5. Figure 5: Comparison of  $Q_S$  values of North West Himalaya with those obtained from parts of North West Himalaya and Delhi region. The compared relations for  $Q_S$  versus frequency are as follows: Garhwal-Kumouan Himalaya:  $Q_S = 175 * f^{0.833}$  (Mukhopadhyay et al., 2010); Kinnaur Himalaya:  $Q_S = 86 * f^{0.96}$  (Kumar et al., 2014) ; Garhwal Himalaya:  $Q_S = 151 * f^{0.84}$  (Negi et al., 2015); Delhi and NCR region:  $Q_S = 98 * f^{1.07}$  (Sharma et al., 2015).
6. Figure 6: Comparison of  $Q_S$  values of this study with regions of different tectonic settings of the world.
7. Figure 7: Site amplitude curves obtained using GINV for horizontal component and vertical component
8. Figure 8: Horizontal to vertical ratio curve obtained using GINV and HVSR method
9. Figure 9:  $V_{s30}$  as a function of  $f_{\text{peak}}$  (a) and  $A_{\text{peak}}$  (b) of GINV method for recording stations at Delhi and Terai region of Uttarakhand.

**List of Tables**

- Table 1: Detail of strong motion recording stations.
- Table 2: Details of earthquakes considered for estimation of site parameters in this work
- Table 3: List of Earthquakes and the corresponding stations considered for the estimation of path parameter.
- Table 4: Resulting parameters of Eq. (7).
- Table 5:  $f_{\text{peak}}$ ,  $A_{\text{peak}}$  and  $V_{s30}$  values for 27 stations located in Terai region of Uttarakhand and Delhi region.
